# Data Preparation of the nuMoM2b Dataset

Anton Goretsky\*    Anastasia Dmitrienko†    Irene Tang‡    Nicolae Lari†  
Owen Kunhardt\*    Raiyan Rashid Khan†    Cassandra Marcussen†    Adam Catto\*  
Daniel Mallia\*    Alisa Leshchenko\*    Adam (Yun Chao) Lin†    Anita Raja\*  
Ansaf Salleb-Aouissi†§    Itsik Pe'er†    Ronald Wapner‡    Cynthia Gyamfi-Bannerman¶

## Abstract

In 2010, the Eunice Kennedy Shriver National Institute of Child Health and Human Development (NICHD) started the Nulliparous Pregnancy Outcomes Study: Monitoring Mothers-to-be (nuMoM2b), a prospective cohort study of a racially/ethnically/geographically diverse population of nulliparous women with singleton gestation. The nuMoM2b is a very large dataset, consisting of data for 10,038 patients with over 4,600 features per patient, spread out over 80 files. In this report, we share our experience preparing and working with this dataset. We present our data preprocessing of the nuMoM2b dataset to get a deeper understanding of the data, extract the most relevant features, make the fewest assumptions when filling in unknown values, and reducing the dimensionality of the data. We hope this report is useful to researchers interested in building machine learning and statistical models from the nuMoM2b dataset.

## 1 Introduction to nuMoM2b and Data Processing

The primary goal of the nuMoM2b study [1] was to determine the maternal characteristics, both clinical and genetic factors, physiological response to pregnancy and environmental factors that could be used to derive models that accurately predict adverse pregnancy outcomes (APOs). Our team has extensive prior experience working on medical data for preterm birth (PTB) prediction [2, 4, 5].

As originally organized, the dataset is not immediately conducive to analysis to those unfamiliar with the medical background, nor is it conducive to quick placement into machine learning models. The ratio of instances to features would result in an inevitable model overfitting. Various medical categories exist within an individual file, data relevant to features exist throughout many different files, and dependencies and redundancies exist across the whole dataset. As such, nuMoM2b required extensive review and processing of features, their dependencies and relations in order to reduce the complexity of the dataset, and shape it in a form amenable to a variety of machine learning (ML) algorithms and exploratory data analysis (EDA).

The intended audience for this document is researchers interested in building machine learning and statistical models from the nuMoM2b dataset. Our aim is to share our experience preparing and working with this dataset. The intent is not to share the processed dataset nor the scripts that are specific to research aims.

Our specific research goal is to build machine learning models for the prediction and prevention of preterm birth in nulliparous women using the nuMoM2b dataset. This project is funded by the NIH/NLM (Project # 1R01LM013327-01). The data review and processing work described in this document was conducted through the direct collaboration of the Computer Science departments at Hunter College and Columbia University, along with maternal and fetal medicine experts at the Columbia University Medical Center. The following are the goals of this collaborative effort:

- Significant reduction of the feature space for a better management of the data and a reduction of the risk for overfitting.

---

\*Department of Computer Science, CUNY Hunter College

†Department of Computer Science, Columbia University

‡Department of Obstetrics and Gynecology, Columbia University

§Contact author [ansaf@cs.columbia.edu](mailto:ansaf@cs.columbia.edu)

¶Department of Obstetrics, Gynecology, and Reproductive Sciences. UC San Diego Health Sciences

- A reformatting of the dataset, to allow for easy configuration of the data, conducive to exploration and machine learning modeling.
- Extensive literature review of existing risk factors related to data categories and causal pathways of PTB.
- Exploratory data analysis of both the reduced and the unmodified feature space.

As a result of the effort, the dataset was reduced to 364 features at the most general level of complexity, and 465 features at a higher level of detail. Extensive filtering and imputation rules were created to accomplish this goal, along with a system for both human readability and easy script interpretation. An extensive literature review was performed documenting odds ratios. EDA was performed on the dataset, comparing calculated odds ratios to the literature review, and discovering and correcting data inconsistencies. Finally, we summarize our thoughts on data preprocessing and nuMoM2b in Section 7.

We summarize and visualize the PTB statistics in the dataset in Figure 1 and 2. See [3] for more details about the dataset.

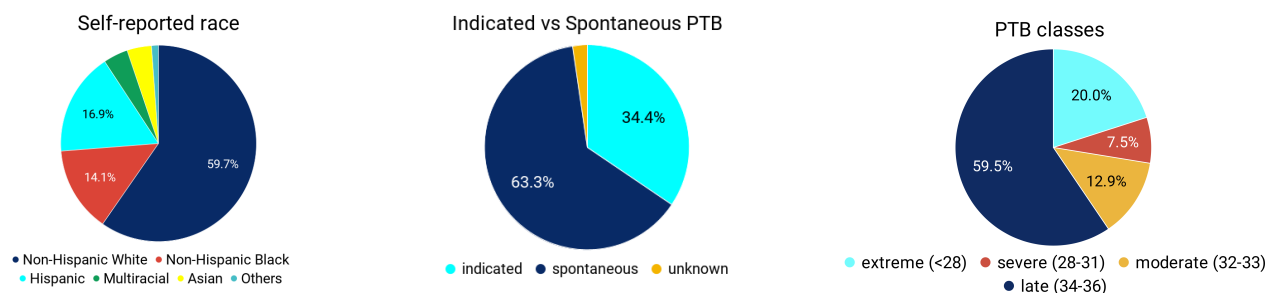

Figure 1: Preliminary statistics in the nuMoM2b data

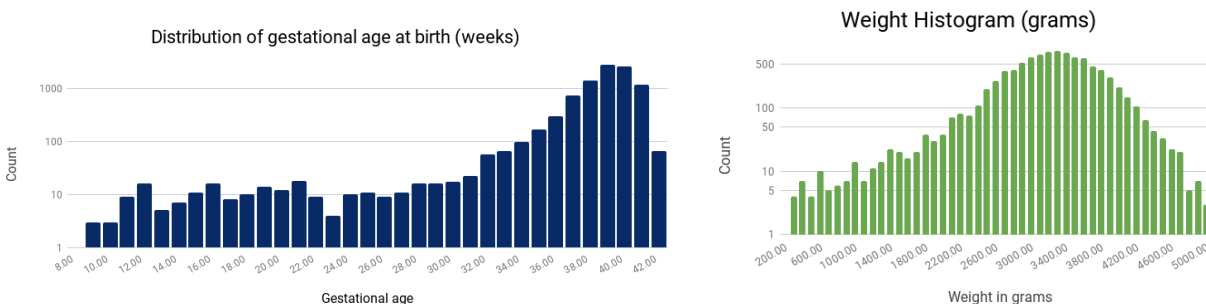

Figure 2: Distribution of gestational age and weight in the nuMoM2b data

## 2 Preprocessing

As part of the preprocessing stage, the information present in the provided codebooks on basic variable statistics, distribution, and type was transferred over via a script to a workable spreadsheet. Then to support our analysis, the following steps were taken:

- **“Data type” was corrected to a more accurate label.** Many variables were labeled “num” for numeric even though they actually represented categorical data. For example, Country of Birth (V1AF08) was labeled numeric. However, country cannot be treated as a numeric feature in modeling. Numeric, according to the codebook, simply meant the values used in labeling were numerals. This problem was repeated across the entire dataset. As such, each variable was looked at manually and categorized properly for typical modeling and analysis. Many variables labeled “num” were changed to “categorical”.

- A “**Missingness**” metric was calculated using the variable statistics provided in the codebook to help with data analysis.
- A new “**Temporal**” label was added in order to label variables that appear at multiple unique time points throughout the study. nuMoM2b data was recorded at several distinct time points, and some variables are updated over time / questions are asked more than once. Temporal had values of True or False.
- A new “**Temporal Detail**” label was added in order to label at which time point a variable is relevant. Not all data collected are relevant only to the moment of collection in the study. For example, many demographic related questions were asked at Visit 2. However, those are static features and significant at all points in the study. This concept will be explained further under the section titled “Timeline”.

Accuracy of action timing, such as treatment administration like medications, and the creation of these “temporal” labels are important for this team’s goals of sequential treatment decision making modeling.

### 3 Organization into Groups

After the preprocessing stage, further organization was desired to better understand and manage the dataset. In order to better organize the data, **Filtering Groups** were created. The goal of these groups was to break down the dataset into more understandable portions for those unfamiliar with the detailed medical content, and for simpler processing of data in bulk. The following were the filtering groups created for the nuMoM2b dataset.

- **Treatment** - Variables relating to intervention in cases of potential or immediate PTB risk, such as progesterone administration, steroids, and last minute medical administrations at delivery.
- **Psychological** - Variables relating to the psychological state of the patient, through multiple scales.
- **Physiological** - Variables relating to instantaneous measurements of physiology, such as temperature, symptoms of flu-like illnesses, blood pressure, etc.
- **Medical History** - Variables relating to long term medical history and conditions, but also various tests performed on both the mother and the fetus or newborn found in the study.
- **Demographics** - Variables relating to the patient’s demographic factors, such as race, income, education, etc.
- **Ultrasound** - Variables that were recorded from the research and clinical ultrasounds the patient went through and marked as such in the dataset.
- **Outcomes** - A metadata file containing various variables that are useful mainly as classifier labels, or are features that were collected post-delivery about the mother or newborn.
- **Activity** - Variables relating to the physical activity of the patient.
- **Toxicology** - Variables relating to the medications taken just before and during pregnancy, and / or their relations to particular reasons / conditions.
- **Family History** - Variables relating to family medical conditions and history.
- **Food Frequency Analysis** - Variables relating to food, diet and vitamins, in the three months prior to pregnancy.
- **Sleep Substudy** - Select variables from the two sleep substudies included in nuMoM2b.

## 4 Processing

Now that the dataset was more simply organized, the process of feature reduction began. Filtering groups were divided among teams, who worked in consultation with the Columbia University Medical Center OB/GYN collaborators, to determine which features to keep as is, which features to summarize into scales, scores, or other aggregate forms, and which features to remove for redundancy or other reasons. As a result of this effort, a system was created to organize the efforts in a form both readable by people, and interpretable by scripts, to allow for easy updates. This system consists of the creation of **Filtering** and **Imputation Rules**, and **Layering**. Filtering rules serve to keep, drop, or summarize features, while imputation rules serve to impute missing data as required by many modeling algorithms. Layering served to organize the data into different levels of abstraction from the most general to the most specific level of information.

### 4.1 Layers

Layers were decided upon given the high feature complexity of nuMoM2b, even after much feature reduction. As many questions are structured around a format of a general question followed by several sub-questions, it was reasoned that the general question should in most cases be representative of the data points that follow. For example, V1AD06 asks, *Have you had any 'flu-like illnesses', 'really bad colds', fever, a rash, or any muscle or joint aches since you became pregnant?* This question is then followed by questions in regard to which symptoms are actually present in this 'flu-like illness'. V1AD06 covers all, and is such a more general question, and thus would be selected into a more general layer, while symptom specific questions would be reserved for the detail-oriented layers, or dropped. If dropped, they may be brought back if desired, or if some significance is found in the most general feature. Internally, we decided upon 3 layers.

- Layer 0 would consist of known risk factors for PTB, along with variables shown to have high odds ratios in our EDA.
- Layer 1 would be the most general layer, consisting of L0 and all general questions that cover as much information as possible.
- Layer 2 would bring back detail that may have been lost, or not included given the generalization and simplicity of L0 and L1.

We will not go into variable-level detail in each layer, but we believe this concept can serve as an organizational method for large complex datasets.

### 4.2 Filtering and Imputation Rules

As part of the data cleaning process, data first passes through a general filtering script, with the rules shown in Table 1. It then passes through an imputation script, with the rules shown in Table 2. Throughout the processing of this dataset, we strived to hold to a set of generally applicable rules for imputation. Below is a sample of the imputation rules used for nuMoM2b.

- If a numeric-like feature is applicable to a vast majority of patients, and the missingness was relatively low, we attempted to impute with a value such as MEAN or MODE. If multiple measurements were made on the same information, the mean took into account all of them (excluding those marked as incomplete or inaccurate).
- If a feature serves as a general precursor to a list of follow-up questions, such as *"Have you had any flu-like illnesses, 'really bad cold', fever, a rash..."* followed by questions regarding symptoms, if data is present in the follow-up but the is missing for the general question, we impute the general question to whatever value represents True. Otherwise we often impute to an unknown or not applicable determiner such as 999, especially if assumption is misleading in the understanding of treatment. Often, these imputation rules looked at follow-up questions that were not included in the current layer or were excluded from modeling, due to the general question covering the topic. For the follow-up questions themselves, imputation may have been left at unknown or imputed to a value depending on the missingness and applicability.
- Negative one (-1) was often used to represent unknown or inapplicable for numeric features.

Table 1: List of Filter Rules and their Descriptions

| Filter Type         | Description                                                                                                                                                                                                       |
|---------------------|-------------------------------------------------------------------------------------------------------------------------------------------------------------------------------------------------------------------|
| TEMP                | Converts complementary Celsius and Fahrenheit temperature features into one Fahrenheit feature                                                                                                                    |
| WEIGHT              | Converts complementary LB and KG weight features into one LB feature                                                                                                                                              |
| ADD                 | Adds up given numeric features into one feature                                                                                                                                                                   |
| ONEHOT              | Aggregates given binary features into one-hot vector                                                                                                                                                              |
| MEAN                | Take the mean value across given numeric features and converts to one feature                                                                                                                                     |
| GROUPCONDITION      | Categorizes 9 binary features corresponding to family history prevalence into 3 separate binary features: spontaneous, indicated, and fetal conditions                                                            |
| ALCSUM              | Combined drinking days/week and drinks/day into a single numeric feature                                                                                                                                          |
| ALCSCALE1           | Combines drinking days/week and drinks/day for one binary feature representing $> 7$ drinks per week                                                                                                              |
| CALC.POLYHYDRAMNIOS | Sum up the 4 quadrants                                                                                                                                                                                            |
| WEEKSUM             | Converts three features (years, months, and weeks) into one weeks feature: $52 * years + 4 * months + weeks$                                                                                                      |
| GROUPCOUNT          | Creates 3 scores among spontaneous, indicated, and fetal conditions for family history risk factors by summing up the following prevalence: 1 for mother, 0.75 for sister, 0.5 for half-sisters, 0.25 for cousins |
| QUITSMOKE           | Combines smoking cessation features into a single binary feature for attempted to quit smoking                                                                                                                    |
| SECONDHAND          | Combines secondhand smoke exposure features into a single binary yes/no feature for exposure                                                                                                                      |
| SMOKESCALE          | Creates 3 categories of cigarettes/day: 0 cpd, 1 to 19 cpd, or 20 cpd                                                                                                                                             |
| DRUGSCALE           | Nonprescribed stimulants (cocaine, amphetamines), nonprescribed depressants (narcotics, heroin all types), methadone (note this is not illicit), other nonprescribed (inhalants, hallucinogens)                   |
| GEST_AGE            | Computes the average age of gestational loss for the first two pregnancies                                                                                                                                        |
| SLEEP_AVG           | Computes the average hours of sleep per night combining across weekdays and weekends                                                                                                                              |
| ADRENAL_MEASURE     | Computes adrenal gland measurements based on ultrasound data, either averaging original and repeated measurements or using whichever is available                                                                 |

- When there is parent feature and there are several related child features that are too detailed, DROP the child features.

## 5 Timeline

This timeline is meant to serve as a high level representation of the way we processed and organized data for internal analysis and modeling. This timeline does not cover all variables and is thus not an exhaustive representation of nuMoM2b. It serves rather as a quick glance into the data currently in use, accurate at time of publication, but subject to change. Each internal substudy may use a different collection of variables for their goals.

This timeline shows the existence of six unique time points that nuMoM2b represents. 5 of those time points are directly sequential, namely **Before Pregnancy**, **Visit 1**, **Visit 2**, **Visit 3**, **Visit 4 (Delivery Visit)**, and **Post Delivery**. There also exists a **Constant** time point, which groups data that may have been collected at different points in the study, but applies at all times to the patient, such as race and pregnancy history. In an ideal full-term pregnancy, the patient would pass through all these time points, and have data recorded under the Constant point. However, if a birth was preterm, still, or a patient missed a visit, their timeline could skip some of either Visit 1, 2 or 3, and move straight to Visit 4, which represents data collected at delivery. This is represented

Table 2: List of Imputation Rules and their Descriptions

| Imputation Name | Description                                                                                                                                       |
|-----------------|---------------------------------------------------------------------------------------------------------------------------------------------------|
| MEAN            | Imputes with the mean (average) of the existing values                                                                                            |
| BMICAT          | Imputes based on existing BMI                                                                                                                     |
| ONEHOT          | Encodes current values by assigning each unique value to an index and assigns a vector of zeros for missing values                                |
| ANY             | Imputes with a value of True if any of given features is present: False otherwise                                                                 |
| MULTI           | Imputes with a value of True if any of given features is present: False otherwise ( <i>different internal organization, outcome same as ANY</i> ) |
| SINGLE          | Imputes with a value of True if a given feature is present: False otherwise                                                                       |
| NEG1            | Imputes missing values with -1                                                                                                                    |
| NUMERIC         | Imputes missing values with the given numeric value                                                                                               |
| MODE            | Imputes with the mode of the existing values                                                                                                      |
| SUM_LEQ         | Imputes with a value of True for Oligohydramnios if sum of Amniotic Fluid Index across 4 quadrants $< 5$ : False otherwise                        |

by the dashed arrow in the timeline. Variables in the timeline are organized by the Filtering Groups described earlier, and are abstractly summarized and simplified in the tables below. On the bottom right we see two boxed sections. These represent time points that occurred in between time points in this timeline. Antepartum evaluations may have occurred between visits, and enrollment screening occurred before visit 1. *To reiterate, this timeline is not representative of all data available or used, but should rather serve as a quick guide.*

Table 3: Amount of patients available at each visit. *Present* numbers are patients who filled out the main maternal interview form. Patients designated as other / missing may still have information available at that visit, especially under Chart Abstractions. **Delivery outcomes are available for almost every patient except those withdrawn.** *Withdrawn* patient counts were approximated using the interval at form A05 recording (official withdrawal). *Other / Missing* represents those not having taken the main maternal interview form, (V#A)

|                         | Visit 1 | Visit 2 | Visit 3 | Visit 4 (Delivery) | Post Delivery |
|-------------------------|---------|---------|---------|--------------------|---------------|
| <b>Present (V#A)</b>    | 10,028  | 9,412   | 9,217   | 7,167              | 9,430         |
| <b>Withdrawn</b>        | 7       | 167     | 213     | 276                | 62            |
| <b>Other or Missing</b> | 2       | 407     | 489     | 2,595              | 608           |

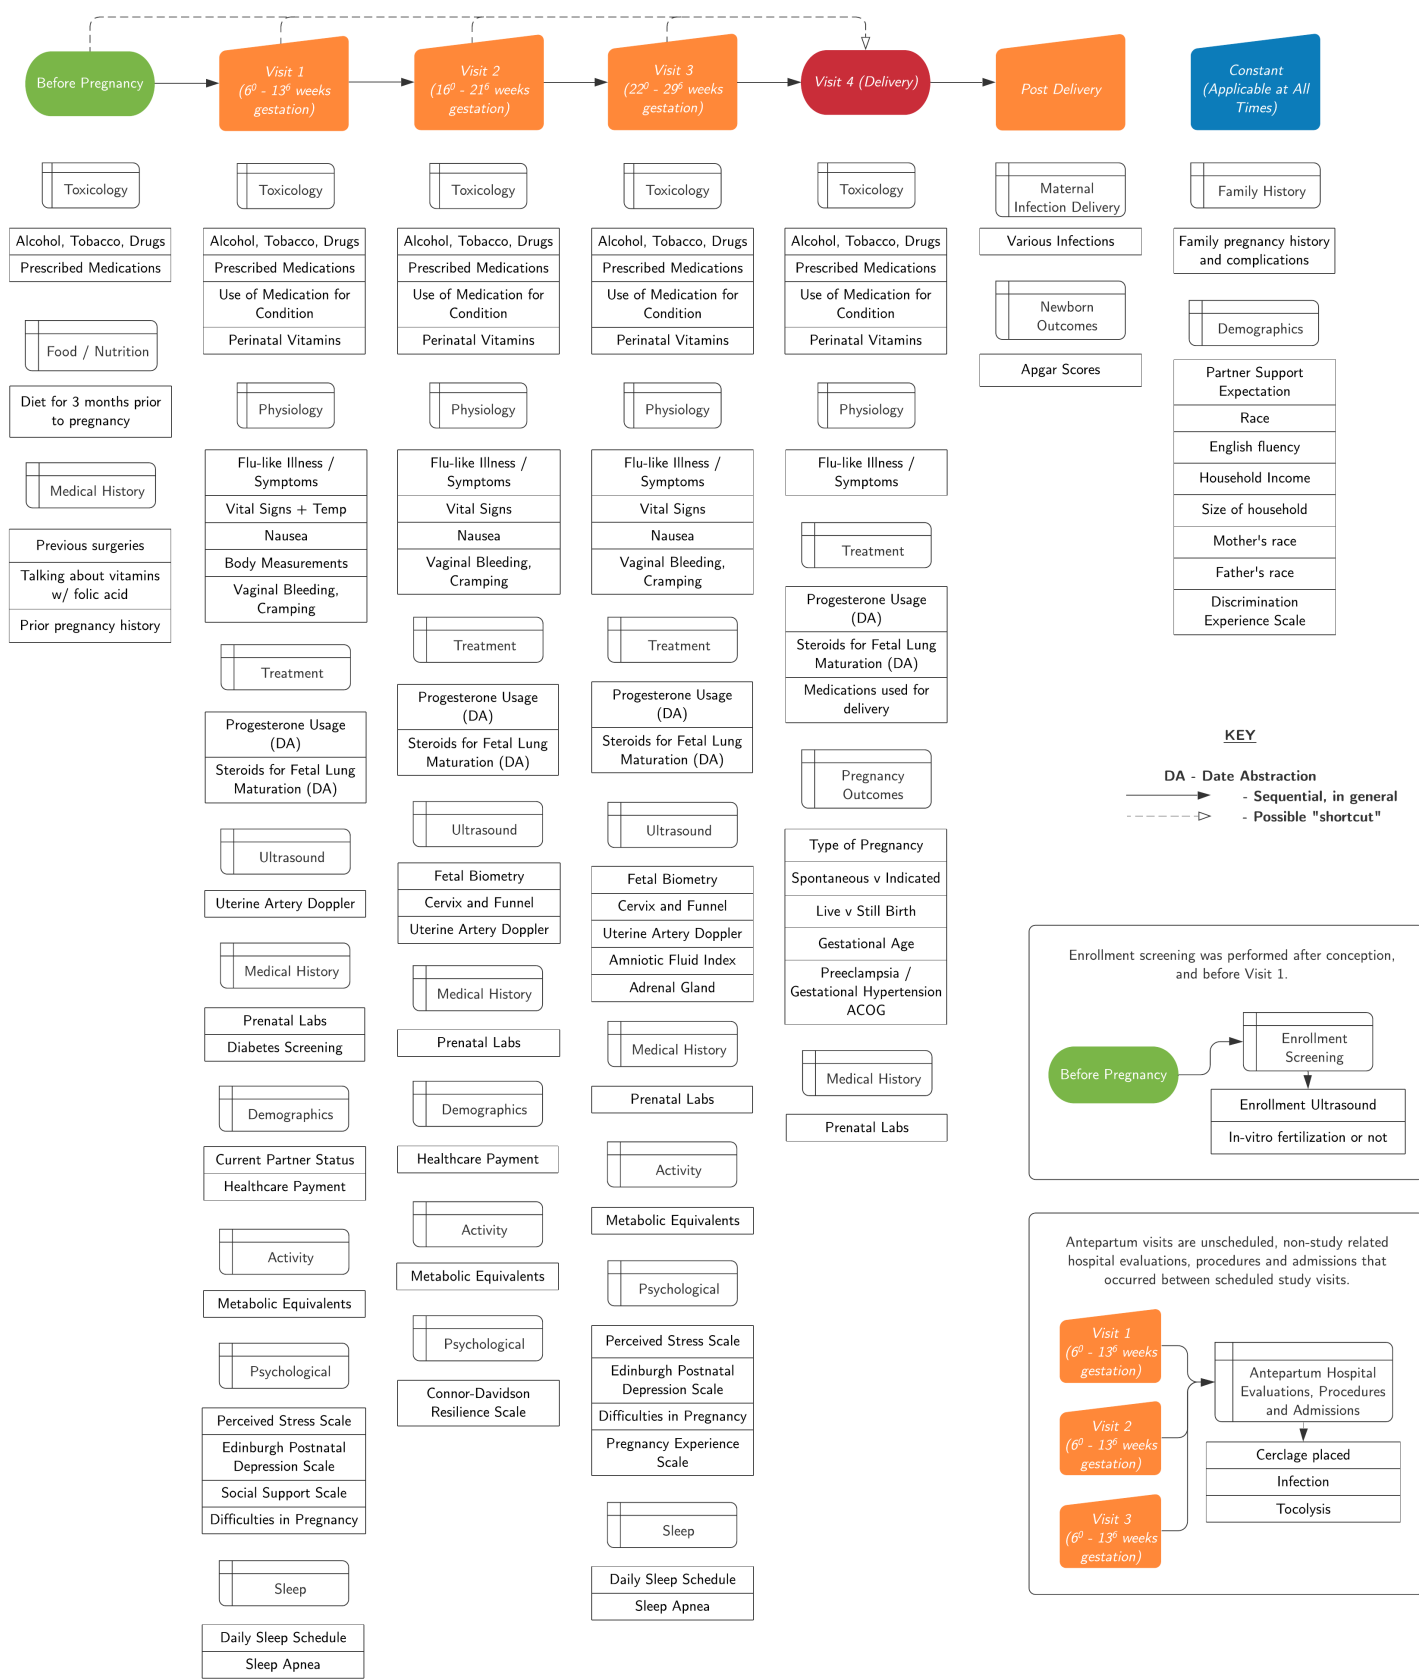

Figure 3: nuMoM2b Processed Data Timeline

## 6 Filtering Group Breakdown

The following is a breakdown of the filtering groups our team decided upon at the time of writing. These groups are subject to change in name and organization, and simply serve to understand and organize the data in a simpler and more manageable fashion. Each group below contains a description of itself, the total number of features marked belonging to said group, the number of features used in layer 1 and layer 2, the files which comprise the group, and a general description of the features that were dropped from our modeling. Following each description, shown is a table of the features both compiled and used as-is. Features used as-is are at the top of the table. Compiled features – those constructed from other variables in the data – follow, and are surrounded by horizontal lines and bolded. Those below a compiled variable are used to construct it, using the rule listed next to the compiled feature. The column **NAME** represents the original or compiled variable name. **FILE** represents the file in the data from which the original feature comes from. **RULE** represents which filtering rule was used to compile a group of features. **TEMPORAL** represents at which point in the timeline this feature is relevant. **TEMPORAL** ranges from -1 to 5, where 1 to 4 represent Visits 1 to 4 (delivery), -1 represents “applies at all time”, 0 represents before pregnancy, and 5 represents post-pregnancy. **IMPUTE** represents which rule was used for imputation. **MISSING** represents the missingness value for each original feature. **DESCRIPTION** is a shortened description from the original data set of each variable.

### 6.1 Family History

The family history filtering compiled all of the questions regarding diagnoses of family members related to diabetes, blood clotting disorders, pregnancy complications, heart disease, and hypertension. The 9 pregnancy-related conditions were grouped into 3 categories:

Spontaneous

- Early or preterm rupture of the membranes
- Spontaneous preterm delivery (less than 37 weeks)

Indicated

- Delivery of a child more than 3 weeks before the expected due date
- Preeclampsia, eclampsia, toxemia or pregnancy-induced hypertension

Fetal Conditions

- Delivery of a child weighing less than 5 lb 8 oz (or 2500 grams)
- Stillbirth
- Delivery of an infant with a birth defect
- Other pregnancy complication

Layer 1 includes binary features indicating any presence of family history in the 3 categories. Layer 2 compiled a more detailed score in the 3 categories which aggregates a score based on the genetic proximity to the stated family member, based on the following scale: 1 for mother, 0.75 for sister, 0.5 for half-sisters or cousins.

**Total # Features:** 113

**Layer 1 # Features:** 3

**Layer 2 # Features:** 3

**Relevant Files:** V2A

**Dropped Features:** We chose to discard family history related to diabetes, blood clotting disorders, heart disease, and hypertension, in order to focus on pregnancy-related conditions. Family history does NOT include the patient’s own medical history.



Table 4: Family History Filtering

| NAME                                                                                 | FILE | RULE           | TEMPORAL | IMPUTE    | MISSING | DESCRIPTION                                                                                                                                                           |
|--------------------------------------------------------------------------------------|------|----------------|----------|-----------|---------|-----------------------------------------------------------------------------------------------------------------------------------------------------------------------|
| <b>V2A_spontaneous_risk,<br/>V2A_indicated_risk,<br/>V2A_fetal_condition_risk</b>    | V2A  | GROUPCONDITION | -1       | GROUPMODE |         |                                                                                                                                                                       |
| V2AE06a                                                                              | V2A  |                | 2        |           | 0.0395  | (V2A) Have any of your biological mother, sisters, half-sisters, or female first cousins ever had: Delivery of a child more than 3 weeks before the expected due date |
| V2AE06b                                                                              | V2A  |                | 2        |           | 0.0414  | (V2A) ' ' Delivery of a child weighing less than 5 lb 8 oz (or 2500 grams)                                                                                            |
| V2AE06c                                                                              | V2A  |                | 2        |           | 0.044   | (V2A) ' ' Spontaneous preterm delivery (<37 weeks)                                                                                                                    |
| V2AE06d                                                                              | V2A  |                | 2        |           | 0.0639  | (V2A) ' ' Early or preterm rupture of the membranes                                                                                                                   |
| V2AE06e                                                                              | V2A  |                | 2        |           | 0.0542  | (V2A) ' ' Preeclampsia, eclampsia, toxemia or pregnancy induced hypertension                                                                                          |
| V2AE06f                                                                              | V2A  |                | 2        |           | 0.0507  | (V2A) ' ' Induction of labor due to low amniotic fluid or poor fetal growth                                                                                           |
| V2AE06g                                                                              | V2A  |                | 2        |           | 0.0268  | (V2A) ' ' Stillbirth                                                                                                                                                  |
| V2AE06h                                                                              | V2A  |                | 2        |           | 0.0227  | (V2A) ' ' Delivery of an infant with a birth defect                                                                                                                   |
| V2AE06i                                                                              | V2A  |                | 2        |           | 0.0266  | (V2A) ' ' Other pregnancy complication, specify                                                                                                                       |
| <b>V2A_spontaneous_score,<br/>V2A_indicated_score,<br/>V2A_fetal_condition_score</b> | V2A  | GROUPCONDITION | -1       | GROUPMEAN |         |                                                                                                                                                                       |
| V2AE07_1a                                                                            | V2A  |                | 2        |           | 0.6137  | (V2A) Family members with pregnancy complications - Family relation (1)                                                                                               |
| V2AE07_1b1                                                                           | V2A  |                | 2        |           | 0.6142  | (V2A) ' ' Pregnancy complication 1 (1)                                                                                                                                |
| V2AE07_1b2                                                                           | V2A  |                | 2        |           | 0.8259  | (V2A) ' ' Pregnancy complication 2 (1)                                                                                                                                |
| V2AE07_1b3                                                                           | V2A  |                | 2        |           | 0.9062  | (V2A) ' ' Pregnancy complication 3 (1)                                                                                                                                |
| V2AE07_1b4                                                                           | V2A  |                | 2        |           | 0.9629  | (V2A) ' ' Pregnancy complication 4 (1)                                                                                                                                |
| V2AE07_1b5                                                                           | V2A  |                | 2        |           | 0.9902  | (V2A) ' ' Pregnancy complication 5 (1)                                                                                                                                |
| V2AE07_1c1                                                                           | V2A  |                | 2        |           | 0.93    | (V2A) ' ' Pregnancy complication 6, specify (1)                                                                                                                       |
| V2AE07_1c2                                                                           | V2A  |                | 2        |           | 0.9939  | (V2A) ' ' Pregnancy complication 7, specify (1)                                                                                                                       |
| V2AE07_2a                                                                            | V2A  |                | 2        |           | 0.9261  | (V2A) ' ' Family relation (2)                                                                                                                                         |
| V2AE07_2b1                                                                           | V2A  |                | 2        |           | 0.9269  | (V2A) ' ' Pregnancy complication 1 (2)                                                                                                                                |
| V2AE07_2b2                                                                           | V2A  |                | 2        |           | 0.9833  | (V2A) ' ' Pregnancy complication 2 (2)                                                                                                                                |
| V2AE07_2b3                                                                           | V2A  |                | 2        |           | 0.9925  | (V2A) ' ' Pregnancy complication 3 (2)                                                                                                                                |
| V2AE07_2b4                                                                           | V2A  |                | 2        |           | 0.9973  | (V2A) ' ' Pregnancy complication 4 (2)                                                                                                                                |
| V2AE07_2b5                                                                           | V2A  |                | 2        |           | 0.9993  | (V2A) ' ' Pregnancy complication 5 (2)                                                                                                                                |
| V2AE07_2c1                                                                           | V2A  |                | 2        |           | 0.9873  | (V2A) ' ' Pregnancy complication 6, specify (2)                                                                                                                       |
| V2AE07_2c2                                                                           | V2A  |                | 2        |           | 0.9982  | (V2A) ' ' Pregnancy complication 7, specify (2)                                                                                                                       |
| V2AE07_3a                                                                            | V2A  |                | 2        |           | 0.9849  | (V2A) ' ' Family relation (3)                                                                                                                                         |
| V2AE07_3b1                                                                           | V2A  |                | 2        |           | 0.985   | (V2A) ' ' Pregnancy complication 1 (3)                                                                                                                                |
| V2AE07_3b2                                                                           | V2A  |                | 2        |           | 0.9985  | (V2A) ' ' Pregnancy complication 2 (3)                                                                                                                                |
| V2AE07_3b3                                                                           | V2A  |                | 2        |           | 0.9993  | (V2A) ' ' Pregnancy complication 3 (3)                                                                                                                                |
| V2AE07_3b4                                                                           | V2A  |                | 2        |           | 0.9998  | (V2A) ' ' Pregnancy complication 4 (3)                                                                                                                                |
| V2AE07_3b5                                                                           | V2A  |                | 2        |           | 1       | (V2A) ' ' Pregnancy complication 5 (3)                                                                                                                                |
| V2AE07_3c1                                                                           | V2A  |                | 2        |           | 0.9967  | (V2A) ' ' Pregnancy complication 6, specify (3)                                                                                                                       |
| V2AE07_3c2                                                                           | V2A  |                | 2        |           | 0.9996  | (V2A) ' ' Pregnancy complication 7, specify (3)                                                                                                                       |
| V2AE07_4a                                                                            | V2A  |                | 2        |           | 0.9964  | (V2A) ' ' Family relation (4)                                                                                                                                         |
| V2AE07_4b1                                                                           | V2A  |                | 2        |           | 0.9964  | (V2A) ' ' Pregnancy complication 1 (4)                                                                                                                                |
| V2AE07_4b2                                                                           | V2A  |                | 2        |           | 0.9999  | (V2A) ' ' Pregnancy complication 2 (4)                                                                                                                                |
| V2AE07_4b3                                                                           | V2A  |                | 2        |           | 1       | (V2A) ' ' Pregnancy complication 3 (4)                                                                                                                                |
| V2AE07_4b4                                                                           | V2A  |                | 2        |           | 1       | (V2A) ' ' Pregnancy complication 4 (4)                                                                                                                                |
| V2AE07_4b5                                                                           | V2A  |                | 2        |           | 1       | (V2A) ' ' Pregnancy complication 5 (4)                                                                                                                                |
| V2AE07_4c1                                                                           | V2A  |                | 2        |           | 0.9995  | (V2A) ' ' Pregnancy complication 6, specify (4)                                                                                                                       |
| V2AE07_4c2                                                                           | V2A  |                | 2        |           | 1       | (V2A) ' ' Pregnancy complication 7, specify (4)                                                                                                                       |
| V2AE07_5a                                                                            | V2A  |                | 2        |           | 0.9992  | (V2A) ' ' Family relation (5)                                                                                                                                         |
| V2AE07_5b1                                                                           | V2A  |                | 2        |           | 0.9992  | (V2A) ' ' Pregnancy complication 1 (5)                                                                                                                                |
| V2AE07_5b2                                                                           | V2A  |                | 2        |           | 1       | (V2A) ' ' Pregnancy complication 2 (5)                                                                                                                                |
| V2AE07_5b3                                                                           | V2A  |                | 2        |           | 1       | (V2A) ' ' Pregnancy complication 3 (5)                                                                                                                                |
| V2AE07_5b4                                                                           | V2A  |                | 2        |           | 1       | (V2A) ' ' Pregnancy complication 4 (5)                                                                                                                                |
| V2AE07_5b5                                                                           | V2A  |                | 2        |           | 1       | (V2A) ' ' Pregnancy complication 5 (5)                                                                                                                                |
| V2AE07_5c1                                                                           | V2A  |                | 2        |           | 1       | (V2A) ' ' Pregnancy complication 6, specify (5)                                                                                                                       |
| V2AE07_5c2                                                                           | V2A  |                | 2        |           | 0.9999  | (V2A) ' ' Pregnancy complication 7, specify (5)                                                                                                                       |

## 6.2 Toxicology

The toxicology filtering relates to questions and chart abstractions regarding any kind of drug use, prescription or non-prescription, by the patient. This includes questions regarding alcohol, tobacco usage, second-hand smoke, smoking cessation, illegal drugs, all prescription medications noted, vitamins, vaccines, and whether medication was being taken for a particular condition. The information used comes from both patient interviews and ancillary files, which corrected the medication information through consensus and chart review.

**Total # Features:** 806

**Layer 1 # Features:** 63

**Layer 2 # Features:** 63

**Relevant Files:** `drugs_in_pregnancy` (ancillary), VXX, V1A, V2A, V3A, V4A

**Dropped Features:** General questions on if a class of drug (non-prescribed) was used were kept in L1. Some detail was saved for L2, such as illegal drug use breakdown. Prescription drugs were organized back into drug categories originally used by the nuMoM2b team in order to reduce dimensionality (see form VXX Section C), perinatal vitamins were separated from the vitamins group due to feature compiled feature *Vitamin\_Multi\_Perinatal\_Folate*, covering that information as well. Metadata features were used to organize and preprocess data, and then dropped from modeling. "Medication taken for condition" features in VXX are dropped as prescribed drugs (as mentioned earlier) and "condition noted" features from VXX in medical history filtering cover said information.

Table 5: Toxicology Filtering

| NAME       | FILE                                        | RULE             | TEMPORAL | IMPUTE | MISSING | DESCRIPTION                                                                                               |
|------------|---------------------------------------------|------------------|----------|--------|---------|-----------------------------------------------------------------------------------------------------------|
| V1AG01     | V1A                                         |                  | 1        | 999    | 0.0007  | (V1A) Have you ever drunk alcohol?                                                                        |
| V1AG04     | V1A                                         |                  | 1        | 999    | 0.0009  | (V1A) Have you ever used any tobacco products including cigarettes and smokeless tobacco?                 |
| V1AG05     | V1A                                         |                  | 1        | 999    | 0.5825  | (V1A) Did you smoke any tobacco products in the three months prior to this pregnancy?                     |
| V1AG07     | V1A                                         |                  | 1        | 999    | 0.584   | (V1A) Did you smoke any tobacco products in the last month?                                               |
| V1AG11     | V1A                                         |                  | 1        | 999    | 0.0013  | (V1A) Have you ever used illegal drugs or drugs not prescribed for you?                                   |
| V2AH02     | V2A                                         |                  | 2        | 999    | 0.0007  | (V2A) Did you smoke any tobacco products in the last month?                                               |
| V2AH06     | V2A                                         |                  | 2        | 999    | 0.0008  | (V2A) Have you used illegal drugs or drugs not prescribed for you in the last month?                      |
| V3AF02     | V3A                                         |                  | 3        | 999    | 0.0001  | (V3A) Did you smoke any tobacco products in the last month?                                               |
| V3AF06     | V3A                                         |                  | 3        | 999    | 0.0005  | (V3A) Have you used illegal drugs or drugs not prescribed for you in the last month?                      |
| V4AF02     | V4A                                         |                  | 4        | 999    | 0.0011  | (V4A) Did you smoke any tobacco products in the month before your delivery?                               |
| V4AF06     | V4A                                         |                  | 4        | 999    | 0.001   | (V4A) Have you used illegal drugs or drugs not prescribed for you in the month before delivery?           |
| DrugName   | <code>drugs_in_pregnancy</code> (ancillary) | VXXC01g, VXXC01h |          | N/A    | 0       | Drug Name corrected from VXXC01b value provided                                                           |
| DrugCode   | <code>drugs_in_pregnancy</code> (ancillary) | VXXC01g, VXXC01h |          | N/A    | 0       | Drug Code corrected from VXXC01c value provided                                                           |
| ReasonCode | <code>drugs_in_pregnancy</code> (ancillary) | VXXC01g, VXXC01h |          | N/A    | 0       | Reason Code corrected from VXXC01e value provided                                                         |
| VXXC01g    | <code>drugs_in_pregnancy</code> (ancillary) | Itself           |          | N/A    | 0.0251  | (VXX) Medications and vaccinations - Start timing                                                         |
| VXXC01h    | <code>drugs_in_pregnancy</code> (ancillary) | Itself           |          | N/A    | 0.5536  | (VXX) Medications and vaccinations - Stopped timing                                                       |
| V1AG05a    | V1A                                         |                  | 0        | 0      | 0.8234  | (V1A) How many cigarettes did you smoke per day in the three months prior to this pregnancy? - # per day, |
| V1AG07a    | V1A                                         |                  | 1        | 0      | 0.9413  | (V1A) How many cigarettes did you smoke per day in the last month? - # per day,                           |
| V2AH02a    | V2A                                         |                  | 2        | 0      | 0.9471  | (V2A) How many cigarettes did you smoke per day? - # per day                                              |
| V3AF02a    | V3A                                         |                  | 3        | 0      | 0.9532  | (V3A) How many cigarettes did you smoke per day? - # per day                                              |
| V4AF02a    | V4A                                         |                  | 4        | 0      | 0.9618  | (V4A) In the month before delivery - How many cigarettes did you smoke per day? # per day                 |
| V1AG10     | V1A                                         |                  | 1        | 0      | 0.5834  | (V1A) In the last month, did you use smokeless tobacco (chew or snuff)?,                                  |

| NAME                 | FILE                           | RULE              | TEMPORAL         | IMPUTE | MISSING | DESCRIPTION                                                                                                               |
|----------------------|--------------------------------|-------------------|------------------|--------|---------|---------------------------------------------------------------------------------------------------------------------------|
| V2AH05               | V2A                            |                   | 2                | 0      | 0.0045  | (V2A) In the last month, did you use smokeless tobacco (chew or snuff)?                                                   |
| V3AF05               | V3A                            |                   | 3                | 0      | 0.004   | (V3A) In the last month, did you use smokeless tobacco (chew or snuff)?                                                   |
| V4AF05               | V4A                            |                   | 4                | 0      | 0.0045  | (V4A) In the month before your delivery - Did you use smokeless tobacco (chew or snuff)?                                  |
| <b>drug_category</b> | drugs_in_pregnancy (ancillary) | drug_cat_creation | VXXC01g, VXXC01h | N/A    | 0       | Compilation of DrugCode's into the respective medication categories as specified in VXX Section C.                        |
| DrugCode             | drugs_in_pregnancy (ancillary) |                   | VXXC01g, VXXC01h |        | 0       | Drug Code corrected from VXXC01c value provided                                                                           |
| VXXC01k              | drugs_in_pregnancy (ancillary) |                   | N/A              |        | 0       | (VXX) Medications and vaccinations - Final assessment: Took medication/vaccine                                            |
| <b>Alc_Usage_V0</b>  |                                | AlcSum            | 0                |        | 999     |                                                                                                                           |
| V1AG02a              | V1A                            |                   | 0                |        | 0.3559  | (V1A) How many days per week did you drink in the three months prior to this pregnancy? - days/week                       |
| V1AG02b              | V1A                            |                   | 0                |        | 0.3558  | (V1A) How many drinks did you drink per drinking day in the three months prior to this pregnancy? - drinks                |
| <b>Alc_Usage_V1</b>  |                                | AlcSum            | 1                |        | 999     |                                                                                                                           |
| V1AG03a              | V1A                            |                   | 1                |        | 0.9621  | (V1A) How many days per week did you drink in the last month? - days/week                                                 |
| V1AG03b              | V1A                            |                   | 1                |        | 0.9621  | (V1A) How many drinks did you drink per drinking day in the last month? - drinks                                          |
| <b>Quit_Smoke_V1</b> |                                | QuitSmoke         | 1                |        |         |                                                                                                                           |
| V1AG08               | V1A                            |                   | 1                | 2      | 0.5833  | (V1A) In the last month, did you use nicotine gum, a nicotine patch, a nicotine spray or a nicotine inhaler?              |
| V1AG09               | V1A                            |                   | 1                | 2      | 0.5833  | (V1A) In the last month, did you take a pill like Zyban (also known as Wellbutrin or Bupropion) to help you quit smoking? |
| <b>SecH_Smoke_V1</b> |                                | SecondHand        | 1                |        |         |                                                                                                                           |
| V1AG07b              | V1A                            |                   | 1                | 2      | 0.4472  | (V1A) In the last month, on average how many hours per week were you exposed to cigarette smoke because of smoking...     |
| V1AG07c              | V1A                            |                   | 1                | 2      | 0.4463  | (V1A) In the last month, how many people (excluding yourself) smoked cigarettes inside the home...                        |
| <b>Drug_Usage_V1</b> |                                | DrugScale         | 1                |        | 999     |                                                                                                                           |
| V1AG12a              | V1A                            |                   | 1                |        | 0.6612  | (V1A) Every used any of these drugs - Marijuana (THC)                                                                     |
| V1AG12b              | V1A                            |                   | 1                |        | 0.6622  | (V1A) Every used any of these drugs - Cocaine                                                                             |
| V1AG12c              | V1A                            |                   | 1                |        | 0.6636  | (V1A) Every used any of these drugs - Prescription narcotics that were not prescribed for you                             |
| V1AG12d              | V1A                            |                   | 1                |        | 0.6627  | (V1A) Every used any of these drugs - Heroin                                                                              |
| V1AG12d1             | V1A                            |                   | 1                |        | 0.9899  | (V1A) Every used any of these drugs - Heroin, Snorted                                                                     |
| V1AG12d2             | V1A                            |                   | 1                |        | 0.99    | (V1A) Every used any of these drugs - Heroin, Injected                                                                    |
| V1AG12d3             | V1A                            |                   | 1                |        | 0.9907  | (V1A) Every used any of these drugs - Heroin, Smoked                                                                      |
| V1AG12d4             | V1A                            |                   | 1                |        | 0.9906  | (V1A) Every used any of these drugs - Heroin, Other                                                                       |
| V1AG12d4_SP          | V1A                            |                   | 1                |        | 0.9999  | (V1A) Every used any of these drugs - Heroin, Other, specify                                                              |
| V1AG12e              | V1A                            |                   | 1                |        | 0.6692  | (V1A) Every used any of these drugs - Methadone                                                                           |
| V1AG12f              | V1A                            |                   | 1                |        | 0.666   | (V1A) Every used any of these drugs - Amphetamines (speed) not prescribed for you                                         |
| V1AG12g              | V1A                            |                   | 1                |        | 0.6665  | (V1A) Every used any of these drugs - Inhalants not prescribed for you                                                    |
| V1AG12h              | V1A                            |                   | 1                |        | 0.6658  | (V1A) Every used any of these drugs - Hallucinogens                                                                       |
| V1AG12i              | V1A                            |                   | 1                |        | 0.6702  | (V1A) Every used any of these drugs - Other                                                                               |
| V1AG12i_SP           | V1A                            |                   | 1                |        | 0.9765  | (V1A) Every used any of these drugs - Other , specify                                                                     |
| <b>Alc_Usage_V2</b>  |                                | AlcSum            | 2                |        | 999     |                                                                                                                           |
| V2AH01a              | V2A                            |                   | 2                |        | 0.9439  | (V2A) How many days per week did you drink? - days/week                                                                   |
| V2AH01b              | V2A                            |                   | 2                |        | 0.9443  | (V2A) How many drinks did you drink per drinking day? - drinks                                                            |
| <b>Quit_Smoke_V2</b> |                                | QuitSmoke         | 2                |        |         |                                                                                                                           |
| V2AH03               | V2A                            |                   | 2                | 2      | 0.0046  | (V2A) In the last month, did you use nicotine gum, a nicotine patch, a nicotine spray or a nicotine inhaler?              |
| V2AH04               | V2A                            |                   | 2                | 2      | 0.0044  | (V2A) In the last month, did you take a pill like Zyban (also known as Wellbutrin or Bupropion) to help you quit smoking? |

| NAME                 | FILE | RULE       | TEMPORAL | IMPUTE | MISSING | DESCRIPTION                                                                                                               |
|----------------------|------|------------|----------|--------|---------|---------------------------------------------------------------------------------------------------------------------------|
| <b>SecH_Smoke_V2</b> |      | SecondHand | 2        |        |         |                                                                                                                           |
| V2AH02b              | V2A  |            | 2        | 2      | 0.0045  | (V2A) In the last month, on average how many hours per week were you exposed to cigarette smoke because of smoking...     |
| V2AH02c              | V2A  |            | 2        | 2      | 0.0008  | (V2A) In the last month, how many people (excluding yourself) smoked cigarettes inside the home...                        |
| <b>Drug_Usage_V2</b> |      | DrugScale  | 2        | 999    |         |                                                                                                                           |
| V2AH07a              | V2A  |            | 2        |        | 0.9888  | (V2A) Drug use in the past month - Marijuana (THC)                                                                        |
| V2AH07b              | V2A  |            | 2        |        | 0.989   | (V2A) Drug use in the past month - Cocaine                                                                                |
| V2AH07c              | V2A  |            | 2        |        | 0.989   | (V2A) Drug use in the past month - Prescription narcotics that were not prescribed for you                                |
| V2AH07d              | V2A  |            | 2        |        | 0.989   | (V2A) Drug use in the past month - Heroin                                                                                 |
| V2AH07d1             | V2A  |            | 2        |        | 0.9998  | (V2A) Drug use in the past month - Heroin, Snorted                                                                        |
| V2AH07d2             | V2A  |            | 2        |        | 0.9998  | (V2A) Drug use in the past month - Heroin, Injected                                                                       |
| V2AH07d3             | V2A  |            | 2        |        | 0.9998  | (V2A) Drug use in the past month - Heroin, Smoked                                                                         |
| V2AH07d4             | V2A  |            | 2        |        | 0.9998  | (V2A) Drug use in the past month - Heroin, Other                                                                          |
| V2AH07d4_SP          | V2A  |            | 2        |        | 1       | (V2A) Drug use in the past month - Heroin, Other, specify                                                                 |
| V2AH07e              | V2A  |            | 2        |        | 0.9891  | (V2A) Drug use in the past month - Methadone                                                                              |
| V2AH07f              | V2A  |            | 2        |        | 0.9891  | (V2A) Drug use in the past month - Amphetamines (speed) not prescribed for you                                            |
| V2AH07g              | V2A  |            | 2        |        | 0.9891  | (V2A) Drug use in the past month - Inhalants not prescribed for you                                                       |
| V2AH07h              | V2A  |            | 2        |        | 0.9891  | (V2A) Drug use in the past month - Hallucinogens                                                                          |
| V2AH07i              | V2A  |            | 2        |        | 0.9891  | (V2A) Drug use in the past month - Other                                                                                  |
| V2AH07i.SP           | V2A  |            | 2        |        | 0.9998  | (V2A) Drug use in the past month - Other, specify                                                                         |
| <b>Alc_Usage_V3</b>  |      | AlcSum     | 3        | 999    |         |                                                                                                                           |
| V3AF01a              | V3A  |            | 3        |        | 0.9303  | (V3A) How many days per week did you drink? - days/week                                                                   |
| V3AF01b              | V3A  |            | 3        |        | 0.9308  | (V3A) How many drinks did you drink per drinking day? - drinks                                                            |
| <b>Quit_Smoke_V3</b> |      | QuitSmoke  | 3        |        |         |                                                                                                                           |
| V3AF03               | V3A  |            | 3        | 2      | 0.004   | (V3A) In the last month, did you use nicotine gum, a nicotine patch, a nicotine spray or a nicotine inhaler?              |
| V3AF04               | V3A  |            | 3        | 2      | 0.0041  | (V3A) In the last month, did you take a pill like Zyban (also known as Wellbutrin or Bupropion) to help you quit smoking? |
| <b>SecH_Smoke_V3</b> |      | SecondHand | 3        |        |         |                                                                                                                           |
| V3AF02b              | V3A  |            | 3        | 2      | 0.3266  | (V3A) In the last month, on average how many hours per week were you exposed to cigarette smoke because of smoking...     |
| V3AF02c              | V3A  |            | 3        | 2      | 0.3262  | (V3A) In the last month, how many people (excluding yourself) smoked cigarettes inside the home...                        |
| <b>Drug_Usage_V3</b> |      | DrugScale  | 3        | 999    |         |                                                                                                                           |
| V3AF07a              | V3A  |            | 3        |        | 0.9932  | (V3A) Drug use in the past month - Marijuana (THC)                                                                        |
| V3AF07b              | V3A  |            | 3        |        | 0.9932  | (V3A) Drug use in the past month - Cocaine                                                                                |
| V3AF07c              | V3A  |            | 3        |        | 0.9932  | (V3A) Drug use in the past month - Prescription narcotics that were not prescribed for you                                |
| V3AF07d              | V3A  |            | 3        |        | 0.9932  | (V3A) Drug use in the past month - Heroin                                                                                 |
| V3AF07d1             | V3A  |            | 3        |        | 1       | (V3A) Drug use in the past month - Heroin, Snorted                                                                        |
| V3AF07d2             | V3A  |            | 3        |        | 1       | (V3A) Drug use in the past month - Heroin, Injected                                                                       |
| V3AF07d3             | V3A  |            | 3        |        | 1       | (V3A) Drug use in the past month - Heroin, Smoked                                                                         |
| V3AF07d4             | V3A  |            | 3        |        | 1       | (V3A) Drug use in the past month - Heroin, Other                                                                          |
| V3AF07d4_SP          | V3A  |            | 3        |        | 1       | (V3A) Drug use in the past month - Heroin, Other, specify                                                                 |
| V3AF07e              | V3A  |            | 3        |        | 0.9932  | (V3A) Drug use in the past month - Methadone                                                                              |
| V3AF07f              | V3A  |            | 3        |        | 0.9932  | (V3A) Drug use in the past month - Amphetamines (speed) not prescribed for you                                            |
| V3AF07g              | V3A  |            | 3        |        | 0.9932  | (V3A) Drug use in the past month - Inhalants not prescribed for you                                                       |
| V3AF07h              | V3A  |            | 3        |        | 0.9932  | (V3A) Drug use in the past month - Hallucinogens                                                                          |
| V3AF07i              | V3A  |            | 3        |        | 0.9932  | (V3A) Drug use in the past month - Other                                                                                  |
| V3AF07i.SP           | V3A  |            | 3        |        | 0.9998  | (V3A) Drug use in the past month - Other, specify                                                                         |
| <b>Alc_Usage_V4</b>  |      | AlcSum     | 4        | 999    |         |                                                                                                                           |
| V4AF01a              | V4A  |            | 4        |        | 0.9399  | (V4A) In the month before delivery - How many days per week did you drink? days/week                                      |
| V4AF01b              | V4A  |            | 4        |        | 0.94    | (V4A) In the month before delivery - How many drinks did you drink per drinking day?                                      |

| NAME                                  | FILE | RULE       | TEMPORAL | IMPUTE | MISSING | DESCRIPTION                                                                                                                                |
|---------------------------------------|------|------------|----------|--------|---------|--------------------------------------------------------------------------------------------------------------------------------------------|
| <b>Quit_Smoke_V4</b>                  |      | QuitSmoke  | 4        |        |         |                                                                                                                                            |
| V4AF03                                | V4A  |            | 4        | 2      | 0.0045  | (V4A) In the month before your delivery - Did you use nicotine gum, a nicotine patch, a nicotine spray or a nicotine inhaler?              |
| V4AF04                                | V4A  |            | 4        | 2      | 0.0045  | (V4A) In the month before your delivery - Did you take a pill like Zyban (also known as Wellbutrin or Bupropion) to help you quit smoking? |
| <b>SecH_Smoke_V4</b>                  |      | SecondHand | 4        |        |         |                                                                                                                                            |
| V4AF02b                               | V4A  |            | 4        | 2      | 0.2594  | (V4A) In the last month, on average how many hours per week were you exposed to cigarette smoke because of smoking...                      |
| V4AF02c                               | V4A  |            | 4        | 2      | 0.2591  | (V4A) In the last month, how many people (excluding yourself) smoked cigarettes inside the home...                                         |
| <b>Drug_Usage_V4</b>                  |      | DrugScale  | 4        | 999    |         |                                                                                                                                            |
| V4AF07a                               | V4A  |            | 4        |        | 0.9964  | (V4A) Drug use in the last month - Marijuana (THC)                                                                                         |
| V4AF07b                               | V4A  |            | 4        |        | 0.9964  | (V4A) Drug use in the last month - Cocaine                                                                                                 |
| V4AF07c                               | V4A  |            | 4        |        | 0.9964  | (V4A) Drug use in the last month - Prescription narcotics that were not prescribed for you                                                 |
| V4AF07d                               | V4A  |            | 4        |        | 0.9964  | (V4A) Drug use in the last month - Heroin                                                                                                  |
| V4AF07d1                              | V4A  |            | 4        |        | 0.9996  | (V4A) Drug use in the last month - Heroin, Snorted                                                                                         |
| V4AF07d2                              | V4A  |            | 4        |        | 0.9996  | (V4A) Drug use in the last month - Heroin, Injected                                                                                        |
| V4AF07d3                              | V4A  |            | 4        |        | 0.9996  | (V4A) Drug use in the last month - Heroin, Smoked                                                                                          |
| V4AF07d4                              | V4A  |            | 4        |        | 0.9996  | (V4A) Drug use in the last month - Heroin, Other                                                                                           |
| V4AF07d4_SP                           | V4A  |            | 4        |        | 1       | (V4A) Drug use in the last month - Heroin, Other, specify                                                                                  |
| V4AF07e                               | V4A  |            | 4        |        | 0.9964  | (V4A) Drug use in the last month - Methadone                                                                                               |
| V4AF07f                               | V4A  |            | 4        |        | 0.9964  | (V4A) Drug use in the last month - Amphetamines (speed) not prescribed for you                                                             |
| V4AF07g                               | V4A  |            | 4        |        | 0.9964  | (V4A) Drug use in the last month - Inhalants not prescribed for you                                                                        |
| V4AF07h                               | V4A  |            | 4        |        | 0.9964  | (V4A) Drug use in the last month - Hallucinogens                                                                                           |
| V4AF07i                               | V4A  |            | 4        |        | 0.9964  | (V4A) Drug use in the last month - Other                                                                                                   |
| V4AF07i_SP                            | V4A  |            | 4        |        | 0.9997  | (V4A) Drug use in the last month - Other , specify                                                                                         |
| <b>Vitamin_Multi-Perinatal_Folate</b> |      | WeekSum    | N/A      | Mean   |         |                                                                                                                                            |
| VXXC02a                               | VXX  |            | N/A      |        | 0.7405  | (VXX) How long have you been taking [perinatal vitamins/other multivitamins/ folate supplements]? - wks                                    |
| VXXC02b                               | VXX  |            | N/A      |        | 0.499   | (VXX) How long have you been taking [perinatal vitamins/other multivitamins/ folate supplements]? - months                                 |
| VXXC02c                               | VXX  |            | N/A      |        | 0.8739  | (VXX) How long have you been taking [perinatal vitamins/other multivitamins/ folate supplements]? - years                                  |

### Toxicology Filtering

### 6.3 Psychological

The psychological filtering compiled all of the features relating to psychological health and wellbeing, including previous treatment for mental health conditions in addition to surveys about factors related to depression, stress, resiliency and social support at the 3 visits.

**Total # Features:** 172

**Layer 1 # Features:** 8

**Layer 2 # Features:** 8

**Relevant Files:** CMA, V1A, V2A, V1C, V1E, V1G, V1H, V2I, V3A, V3C, V3E, V3J

**Dropped Features:** We chose to discard features related to prenatal and postpartum treatment for mental health conditions, in the case that some conditions were not diagnosed, to focus on the current state of mind throughout the pregnancy as measured by the surveys.

Table 6: Psychological Filtering

| NAME                      | FILE | RULE | TEMPORAL | IMPUTE | MISSING | DESCRIPTION                                                                                                            |
|---------------------------|------|------|----------|--------|---------|------------------------------------------------------------------------------------------------------------------------|
| V1EA01                    | V1E  |      | 1        | ONEHOT | 0.0887  | (V1E) Are you feeling bothered, upset or worried at this point in your pregnancy?                                      |
| V3EA01                    | V3E  |      | 3        | ONEHOT | 0.0826  | (V3E) Are you feeling bothered, upset or worried at this point in your pregnancy?                                      |
| <b>V1A_STRESS_SUMMARY</b> | V1A  | ADD  | 1        | MEAN   |         |                                                                                                                        |
| V1AH01                    | V1A  |      | 1        |        | 0.0039  | (V1A) In the last month, how often have you been upset because of something that happened unexpectedly?                |
| V1AH02                    | V1A  |      | 1        |        | 0.004   | (V1A) In the last month, how often have you felt that you were unable to control the important things in your life?    |
| V1AH03                    | V1A  |      | 1        |        | 0.0043  | (V1A) In the last month, how often have you felt nervous and 'stressed'?                                               |
| V1AH04                    | V1A  |      | 1        |        | 0.0041  | (V1A) In the last month, how often have you felt confident about your ability to handle your personal problems?        |
| V1AH05                    | V1A  |      | 1        |        | 0.0045  | (V1A) In the last month, how often have you felt that things were going your way?                                      |
| V1AH06                    | V1A  |      | 1        |        | 0.0041  | (V1A) In the last month, how often have you found that you could not cope with all the things that you had to do?      |
| V1AH07                    | V1A  |      | 1        |        | 0.0048  | (V1A) In the last month, how often have you been able to control irritations in your life?                             |
| V1AH08                    | V1A  |      | 1        |        | 0.0048  | (V1A) In the last month, how often have you felt that you were on top of things?                                       |
| V1AH09                    | V1A  |      | 1        |        | 0.0045  | (V1A) In the last month, how often have you been angered because of things that were outside of your control?          |
| V1AH10                    | V1A  |      | 1        |        | 0.0043  | (V1A) In the last month, how often have you felt difficulties were piling up so high that you could not overcome them? |

| NAME                          | FILE | RULE | TEMPORAL | IMPUTE | MISSING | DESCRIPTION                                                                                              |
|-------------------------------|------|------|----------|--------|---------|----------------------------------------------------------------------------------------------------------|
| <b>V1C_DEPRESSION_SUMMARY</b> | V1C  | ADD  | 1        | MEAN   |         |                                                                                                          |
| V1CA01                        | V1C  |      | 1        |        | 0.0003  | (V1C) Edinburgh Postnatal Depression Scale - I have been able to laugh and see the funny side of things  |
| V1CA02                        | V1C  |      | 1        |        | 0.0004  | (V1C) Edinburgh Postnatal Depression Scale - I have looked forward with enjoyment to things.             |
| V1CA03                        | V1C  |      | 1        |        | 0.0005  | (V1C) Edinburgh Postnatal Depression Scale - I have blamed myself unnecessarily when things went wrong.  |
| V1CA04                        | V1C  |      | 1        |        | 0.0006  | (V1C) Edinburgh Postnatal Depression Scale - I have been anxious or worried for no good reason.          |
| V1CA05                        | V1C  |      | 1        |        | 0.0003  | (V1C) Edinburgh Postnatal Depression Scale - I have felt scared or panicky for no very good reason.      |
| V1CA06                        | V1C  |      | 1        |        | 0.0041  | (V1C) Edinburgh Postnatal Depression Scale - Things have been getting on top of me.                      |
| V1CA07                        | V1C  |      | 1        |        | 0.004   | (V1C) Edinburgh Postnatal Depression Scale - I have been so unhappy that I have had difficulty sleeping. |
| V1CA08                        | V1C  |      | 1        |        | 0.004   | (V1C) Edinburgh Postnatal Depression Scale - I have felt sad or miserable.                               |
| V1CA09                        | V1C  |      | 1        |        | 0.004   | (V1C) Edinburgh Postnatal Depression Scale - I have been so unhappy that I have been crying.             |
| V1CA10                        | V1C  |      | 1        |        | 0.0038  | (V1C) Edinburgh Postnatal Depression Scale - The thought of harming myself has occurred to me.           |
| <b>V1G_SOCIAL_SCALE</b>       | V1G  | ADD  | 1        | MEAN   |         |                                                                                                          |
| V1GA01                        | V1G  |      | 1        |        | 0.0008  | (V1G) Social Support - There is a special person who is around when I am in need                         |
| V1GA02                        | V1G  |      | 1        |        | 0.0005  | (V1G) Social Support - There is a special person with whom I can share my joys and sorrows               |
| V1GA03                        | V1G  |      | 1        |        | 0.0019  | (V1G) Social Support - My family really tries to help me                                                 |
| V1GA04                        | V1G  |      | 1        |        | 0.0008  | (V1G) Social Support - I get the emotional help and support I need from my family                        |
| V1GA05                        | V1G  |      | 1        |        | 0.0009  | (V1G) Social Support - I have a special person who is a real source of comfort to me                     |
| V1GA06                        | V1G  |      | 1        |        | 0.0006  | (V1G) Social Support - My friends really try to help me                                                  |
| V1GA07                        | V1G  |      | 1        |        | 0.001   | (V1G) Social Support - I can count on my friends when things go wrong                                    |
| V1GA08                        | V1G  |      | 1        |        | 0.0006  | (V1G) Social Support - I can talk about my problems with my family                                       |
| V1GA09                        | V1G  |      | 1        |        | 0.0013  | (V1G) Social Support - I have friends with whom I can share my joys and sorrows                          |
| V1GA10                        | V1G  |      | 1        |        | 0.0007  | (V1G) Social Support - There is a special person in my life who cares about my feelings                  |
| V1GA11                        | V1G  |      | 1        |        | 0.0013  | (V1G) Social Support - My family is willing to help me make decisions                                    |
| V1GA12                        | V1G  |      | 1        |        | 0.0006  | (V1G) Social Support - I can talk about my problems with my friends                                      |

| NAME                          | FILE | RULE | TEMPORAL | IMPUTE | MISSING | DESCRIPTION                                                                                                                                     |
|-------------------------------|------|------|----------|--------|---------|-------------------------------------------------------------------------------------------------------------------------------------------------|
| <b>V2I_RESELIENCE_SUMMARY</b> | V2I  | ADD  | 2        | MEAN   |         |                                                                                                                                                 |
| V2IA01                        | V2I  |      | 2        |        | 0.0006  | (V2I) Able to adapt to change                                                                                                                   |
| V2IA02                        | V2I  |      | 2        |        | 0.0004  | (V2I) Close and secure relationships                                                                                                            |
| V2IA03                        | V2I  |      | 2        |        | 0.0021  | (V2I) Sometimes fate or God can help                                                                                                            |
| V2IA04                        | V2I  |      | 2        |        | 0.0004  | (V2I) Can deal with whatever comes                                                                                                              |
| V2IA05                        | V2I  |      | 2        |        | 0.0015  | (V2I) Past success gives confidence for new challenge                                                                                           |
| V2IA06                        | V2I  |      | 2        |        | 0.0009  | (V2I) See the humorous side of things                                                                                                           |
| V2IA07                        | V2I  |      | 2        |        | 0.001   | (V2I) Coping with stress strengthens                                                                                                            |
| V2IA08                        | V2I  |      | 2        |        | 0.0008  | (V2I) Tend to bounce back after illness or hardship                                                                                             |
| V2IA09                        | V2I  |      | 2        |        | 0.0013  | (V2I) Things happen for a reason                                                                                                                |
| V2IA10                        | V2I  |      | 2        |        | 0.0004  | (V2I) Best effort no matter what                                                                                                                |
| V2IA11                        | V2I  |      | 2        |        | 0.0006  | (V2I) You can achieve your goals                                                                                                                |
| V2IA12                        | V2I  |      | 2        |        | 0.0004  | (V2I) When things look hopeless, I don't give up                                                                                                |
| V2IA13                        | V2I  |      | 2        |        | 0.0006  | (V2I) Know where to turn for help                                                                                                               |
| V2IA14                        | V2I  |      | 2        |        | 0.0006  | (V2I) Under pressure, focus and think clearly                                                                                                   |
| V2IA15                        | V2I  |      | 2        |        | 0.0059  | (V2I) Prefer to take the lead in problem solving                                                                                                |
| V2IA16                        | V2I  |      | 2        |        | 0.0063  | (V2I) Not easily discouraged by failure                                                                                                         |
| V2IA17                        | V2I  |      | 2        |        | 0.0083  | (V2I) Think of self as strong person                                                                                                            |
| V2IA18                        | V2I  |      | 2        |        | 0.0064  | (V2I) Make unpopular or difficult decisions                                                                                                     |
| V2IA19                        | V2I  |      | 2        |        | 0.0062  | (V2I) Can handle unpleasant feelings                                                                                                            |
| V2IA20                        | V2I  |      | 2        |        | 0.0063  | (V2I) Have to act on a hunch                                                                                                                    |
| V2IA21                        | V2I  |      | 2        |        | 0.0062  | (V2I) Strong sense of purpose                                                                                                                   |
| V2IA22                        | V2I  |      | 2        |        | 0.0061  | (V2I) In control of your life                                                                                                                   |
| V2IA23                        | V2I  |      | 2        |        | 0.0063  | (V2I) I like challenges                                                                                                                         |
| V2IA24                        | V2I  |      | 2        |        | 0.006   | (V2I) You work to attain your goals                                                                                                             |
| V2IA25                        | V2I  |      | 2        |        | 0.0061  | (V2I) Pride in your achievements                                                                                                                |
| <b>V3A_STRESS_SUMMARY</b>     | V3A  | ADD  | 3        | MEAN   |         |                                                                                                                                                 |
| V3AG01                        | V3A  |      | 3        |        | 0.0016  | (V3A) Perceived Stress Scale - In the last month, how often have you been upset because of something that happened unexpectedly?                |
| V3AG02                        | V3A  |      | 3        |        | 0.0014  | (V3A) Perceived Stress Scale - In the last month, how often have you felt that you were unable to control the important things in your life?    |
| V3AG03                        | V3A  |      | 3        |        | 0.0014  | (V3A) Perceived Stress Scale - In the last month, how often have you felt nervous and 'stressed'?                                               |
| V3AG04                        | V3A  |      | 3        |        | 0.0016  | (V3A) Perceived Stress Scale - In the last month, how often have you felt confident about your ability to handle your personal problems?        |
| V3AG05                        | V3A  |      | 3        |        | 0.0016  | (V3A) Perceived Stress Scale - In the last month, how often have you felt that things were going your way?                                      |
| V3AG06                        | V3A  |      | 3        |        | 0.0017  | (V3A) Perceived Stress Scale - In the last month, how often have you found that you could not cope with all the things that you had to do?      |
| V3AG07                        | V3A  |      | 3        |        | 0.0028  | (V3A) Perceived Stress Scale - In the last month, how often have you been able to control irritations in your life?                             |
| V3AG08                        | V3A  |      | 3        |        | 0.002   | (V3A) Perceived Stress Scale - In the last month, how often have you felt that you were on top of things?                                       |
| V3AG09                        | V3A  |      | 3        |        | 0.0015  | (V3A) Perceived Stress Scale - In the last month, how often have you been angered because of things that were outside of your control?          |
| V3AG10                        | V3A  |      | 3        |        | 0.0015  | (V3A) Perceived Stress Scale - In the last month, how often have you felt difficulties were piling up so high that you could not overcome them? |



| NAME                   | FILE | RULE | TEMPORAL | IMPUTE | MISSING | DESCRIPTION                                                                                              |
|------------------------|------|------|----------|--------|---------|----------------------------------------------------------------------------------------------------------|
| V3C_DEPRESSION_SUMMARY | V3C  | ADD  | 3        | MEAN   |         |                                                                                                          |
| V3CA01                 | V3C  |      | 3        |        | 0.0007  | (V3C) Edinburgh Postnatal Depression Scale - I have been able to laugh and see the funny side of things  |
| V3CA02                 | V3C  |      | 3        |        | 0.0007  | (V3C) Edinburgh Postnatal Depression Scale - I have looked forward with enjoyment to things.             |
| V3CA03                 | V3C  |      | 3        |        | 0.0007  | (V3C) Edinburgh Postnatal Depression Scale - I have blamed myself unnecessarily when things went wrong.  |
| V3CA04                 | V3C  |      | 3        |        | 0.0008  | (V3C) Edinburgh Postnatal Depression Scale - I have been anxious or worried for no good reason.          |
| V3CA05                 | V3C  |      | 3        |        | 0.0009  | (V3C) Edinburgh Postnatal Depression Scale - I have felt scared or panicky for no very good reason.      |
| V3CA06                 | V3C  |      | 3        |        | 0.0064  | (V3C) Edinburgh Postnatal Depression Scale - Things have been getting on top of me.                      |
| V3CA07                 | V3C  |      | 3        |        | 0.006   | (V3C) Edinburgh Postnatal Depression Scale - I have been so unhappy that I have had difficulty sleeping. |
| V3CA08                 | V3C  |      | 3        |        | 0.0059  | (V3C) Edinburgh Postnatal Depression Scale - I have felt sad or miserable.                               |
| V3CA09                 | V3C  |      | 3        |        | 0.0059  | (V3C) Edinburgh Postnatal Depression Scale - I have been so unhappy that I have been crying.             |
| V3CA10                 | V3C  |      | 3        |        | 0.0059  | (V3C) Edinburgh Postnatal Depression Scale - The thought of harming myself has occurred to me.           |

#### Psychological Filtering

## 6.4 Activity

The activity filtering related to details about participant physical activity prior to and during pregnancy. The activities were measured in METs, or metabolic equivalents, for Layer 1 and expanded upon in further detail, namely activity type, minutes, miles and duration in Layer 2. Activity restriction information available at V3 and V4 was also included, to account for influence on the MET score.

**Total # Features:** 131

**Layer 1 # Features:** 3

**Layer 2 # Features:** 22

**Relevant Files:** physical\_activity (ancillary), V1A, V2A, V3A, V4A

**Dropped Features:** We chose to discard features relating to any personal or care provider weight change goals, as these were suggestions that would merely be reflected in the actual activity data.

Table 7: Activity Filtering

| NAME                   | FILE              | RULE     | TEMPORAL | IMPUTE | MISSING | DESCRIPTION                                                                               |
|------------------------|-------------------|----------|----------|--------|---------|-------------------------------------------------------------------------------------------|
| Visit1_MET             | physical_activity |          | 1        | mean   | 0       | Visit 1 MET Equivalents                                                                   |
| Visit2_MET             | physical_activity |          | 2        | mean   | 0       | Visit 2 MET Equivalents                                                                   |
| Visit3_MET             | physical_activity |          | 3        | mean   | 0       | Visit 3 MET Equivalents                                                                   |
| V1A_ACTIVITY_1         | V1A               | V1AI01   | 1        | onehot | 0.001   | During the past 4 weeks, did you participate in any physical activities?                  |
| V1A_ACTIVITY_1.code    | V1A               | V1AI01a  | 1        | onehot | 0.2987  | (Activity #1) - Code                                                                      |
| V1A_ACTIVITY_1.weekly  | V1A               | V1AI01a1 | 1        | mean   | 0.2991  | How many times per week did you take part in this activity during the past 4 weeks?       |
| V1A_ACTIVITY_1.minutes | V1A               | V1AI01a2 | 1        | mean   | 0.3063  | And when you took part in this activity, for how many minutes did you usually keep at it? |
| V1A_ACTIVITY_1.miles   | V1A               | V1AI01a3 | 1        | mean   | 0.6079  | How far do you usually walk/run/jog/cycle/swim? (Activity #1) - miles                     |
| V1A_ACTIVITY_2         | V1A               | V1AI02   | 1        | onehot | 0.3016  | During the past 4 weeks, did you participate in any physical activities?                  |
| V1A_ACTIVITY_2.code    | V1A               | V1AI02a  | 1        | onehot | 0.7045  | (Activity #2) - Code                                                                      |
| V1A_ACTIVITY_2.weekly  | V1A               | V1AI02a1 | 1        | mean   | 0.7051  | How many times per week did you take part in this activity during the past 4 weeks?       |
| V1A_ACTIVITY_2.minutes | V1A               | V1AI02a2 | 1        | mean   | 0.7074  | And when you took part in this activity, for how many minutes did you usually keep at it? |
| V1A_ACTIVITY_2.miles   | V1A               | V1AI02a3 | 1        | mean   | 0.9092  | How far do you usually walk/run/jog/cycle/swim? (Activity #2) - miles                     |
| V1A_ACTIVITY_3         | V1A               | V1AI03   | 1        | onehot | 0.7083  | During the past 4 weeks, did you participate in any physical activities?                  |
| V1A_ACTIVITY_3.code    | V1A               | V1AI03a  | 1        | onehot | 0.8957  | (Activity #3) - Code                                                                      |
| V1A_ACTIVITY_3.weekly  | V1A               | V1AI03a1 | 1        | mean   | 0.8961  | How many times per week did you take part in this activity during the past 4 weeks?       |
| V1A_ACTIVITY_3.minutes | V1A               | V1AI03a2 | 1        | mean   | 0.8965  | And when you took part in this activity, for how many minutes did you usually keep at it? |
| V1A_ACTIVITY_3.miles   | V1A               | V1AI03a3 | 1        | mean   | 0.9733  | How far do you usually walk/run/jog/cycle/swim? (Activity #3) - miles                     |
| V2A_ACTIVITY_1         | V2A               | V2AJ01   | 2        | onehot | 0.0003  | During the past 4 weeks, did you participate in any physical activities?                  |
| V2A_ACTIVITY_1.code    | V2A               | V2AJ01a  | 2        | onehot | 0.2581  | (Activity #1) - Code                                                                      |
| V2A_ACTIVITY_1.weekly  | V2A               | V2AJ01a1 | 2        | mean   | 0.2592  | How many times per week did you take part in this activity during the past 4 weeks?       |

| NAME                   | FILE | RULE     | TEMPORAL | IMPUTE | MISSING | DESCRIPTION                                                                               |
|------------------------|------|----------|----------|--------|---------|-------------------------------------------------------------------------------------------|
| V2A_ACTIVITY_1_minutes | V2A  | V2AJ01a2 | 2        | mean   | 0.2695  | And when you took part in this activity, for how many minutes did you usually keep at it? |
| V2A_ACTIVITY_1_miles   | V2A  | V2AJ01a3 | 2        | mean   | 0.5907  | How far do you usually walk/run/jog/cycle/swim? (Activity #1) - miles                     |
| V2A_ACTIVITY_2         | V2A  | V2AJ02   | 2        | onehot | 0.258   | During the past 4 weeks, did you participate in any physical activities?                  |
| V2A_ACTIVITY_2.code    | V2A  | V2AJ02a  | 2        | onehot | 0.696   | (Activity #2) - Code                                                                      |
| V2A_ACTIVITY_2_weekly  | V2A  | V2AJ02a1 | 2        | mean   | 0.6972  | How many times per week did you take part in this activity during the past 4 weeks?       |
| V2A_ACTIVITY_2_minutes | V2A  | V2AJ02a2 | 2        | mean   | 0.7003  | And when you took part in this activity, for how many minutes did you usually keep at it? |
| V2A_ACTIVITY_2_miles   | V2A  | V2AJ02a3 | 2        | mean   | 0.911   | How far do you usually walk/run/jog/cycle/swim? (Activity #2) - miles                     |
| V2A_ACTIVITY_3         | V2A  | V2AJ03   | 2        | onehot | 0.6924  | During the past 4 weeks, did you participate in any physical activities?                  |
| V2A_ACTIVITY_3.code    | V2A  | V2AJ03a  | 2        | onehot | 0.9019  | (Activity #3) - Code                                                                      |
| V2A_ACTIVITY_3_weekly  | V2A  | V2AJ03a1 | 2        | mean   | 0.902   | How many times per week did you take part in this activity during the past 4 weeks?       |
| V2A_ACTIVITY_3_minutes | V2A  | V2AJ03a2 | 2        | mean   | 0.9031  | And when you took part in this activity, for how many minutes did you usually keep at it? |
| V2A_ACTIVITY_3_miles   | V2A  | V2AJ03a3 | 2        | mean   | 0.978   | How far do you usually walk/run/jog/cycle/swim? (Activity #3) - miles                     |
| V3A_ACTIVITY_1         | V3A  | V3AH01   | 3        | onehot | 0.0002  | During the past 4 weeks, did you participate in any physical activities?                  |
| V3A_ACTIVITY_1.code    | V3A  | V3AH01a  | 3        | onehot | 0.2896  | (Activity #1) - Code                                                                      |
| V3A_ACTIVITY_1_weekly  | V3A  | V3AH01a1 | 3        | mean   | 0.2906  | How many times per week did you take part in this activity during the past 4 weeks?       |
| V3A_ACTIVITY_1_minutes | V3A  | V3AH01a2 | 3        | mean   | 0.3001  | And when you took part in this activity, for how many minutes did you usually keep at it? |
| V3A_ACTIVITY_1_miles   | V3A  | V3AH01a3 | 3        | mean   | 0.6231  | How far do you usually walk/run/jog/cycle/swim? (Activity #1) - miles                     |
| V3A_ACTIVITY_2         | V3A  | V3AH02   | 3        | onehot | 0.289   | During the past 4 weeks, did you participate in any physical activities?                  |
| V3A_ACTIVITY_2.code    | V3A  | V3AH02a  | 3        | onehot | 0.739   | (Activity #2) - Code                                                                      |
| V3A_ACTIVITY_2_weekly  | V3A  | V3AH02a1 | 3        | mean   | 0.7392  | How many times per week did you take part in this activity during the past 4 weeks?       |
| V3A_ACTIVITY_2_minutes | V3A  | V3AH02a2 | 3        | mean   | 0.7411  | And when you took part in this activity, for how many minutes did you usually keep at it? |
| V3A_ACTIVITY_2_miles   | V3A  | V3AH02a3 | 3        | mean   | 0.9277  | How far do you usually walk/run/jog/cycle/swim? (Activity #2) - miles                     |
| V3A_ACTIVITY_3         | V3A  | V3AH03   | 3        | onehot | 0.7376  | During the past 4 weeks, did you participate in any physical activities?                  |
| V3A_ACTIVITY_3.code    | V3A  | V3AH03a  | 3        | onehot | 0.923   | (Activity #3) - Code                                                                      |
| V3A_ACTIVITY_3_weekly  | V3A  | V3AH03a1 | 3        | mean   | 0.923   | How many times per week did you take part in this activity during the past 4 weeks?       |

| NAME                   | FILE | RULE     | TEMPORAL | IMPUTE | MISSING | DESCRIPTION                                                                               |
|------------------------|------|----------|----------|--------|---------|-------------------------------------------------------------------------------------------|
| V3A_ACTIVITY_3_minutes | V3A  | V3AH03a2 | 3        | mean   | 0.9234  | And when you took part in this activity, for how many minutes did you usually keep at it? |
| V3A_ACTIVITY_3_miles   | V3A  | V3AH03a3 | 3        | mean   | 0.9817  | How far do you usually walk/run/jog/cycle/swim? (Activity #3) - miles                     |
| V3AD07                 | V3A  |          | 3        | mode   | 0.0435  | (V3A) Has a care provider told you to restrict your activity in any way?                  |
| V4AE02                 | V4A  |          | 4        | mode   | 0.006   | (V4A) Before delivery, did a care provider tell you to restrict your activity in any way? |

#### Activity Filtering

## 6.5 Demographics

The demographics filtering includes details about social factors including education and marital status, in addition to the more medically relevant factors of race, healthcare access and stress levels related to partner support.

**Total # Features:** 170

**Layer 1 # Features:** 21

**Layer 2 # Features:** 22

**Relevant Files:** V1A, V2A

**Dropped Features:** We chose to discard redundant features such as the racial background of the mother’s parents since that information is inherently stored in the mother’s race herself. Social constructs like ethnicity and perceived race (by others) were not deemed medically relevant, so those were also removed. Experiences in discrimination would further account for some of their social effects. We also believed that expectations for partner support was a more relevant proxy of social support than questions about the nature of the relationship such as length of relationship.

Table 8: Demographics Filtering

| NAME    | FILE | RULE | TEMPORAL | IMPUTE | MISSING | DESCRIPTION                                                                                                           |
|---------|------|------|----------|--------|---------|-----------------------------------------------------------------------------------------------------------------------|
| V1AF02  | V1A  |      | 1        | Mean   | 0.0008  | (V1A) How many years of education have you completed?                                                                 |
| V1AF03  | V1A  |      | 1        | Onehot | 0.0015  | (V1A) Do you currently have a partner or 'significant other'?                                                         |
| V1AF04  | V1A  |      | 1        | Onehot | 0.0015  | (V1A) What is your current marital status?                                                                            |
| V1AF05  | V1A  |      | -1       | Onehot | 0.0001  | (V1A) Are you of Hispanic or Latino origin or descent?                                                                |
| V1AF09  | V1A  |      | -1       | Mean   | 0.0057  | (V1A) How many years have you lived in the United States? - years,                                                    |
| V1AF10  | V1A  |      | -1       | Onehot | 0.0005  | (V1A) How would you rate your ability to speak and understand English?                                                |
| V1AF13  | V1A  |      | -1       | Mean   | 0.0018  | (V1A) Counting yourself, how many people live in your household? - people                                             |
| V1AF14  | V1A  |      | -1       | Mean   | 0.1893  | (V1A) Total family income for the past 12 months                                                                      |
| V2AF02  | V2A  |      | 2        | Onehot | 0.0007  | (V2A) Do you currently have a partner or 'significant other'?                                                         |
| V2AF02a | V2A  |      | 2        | Onehot | 0.0611  | (V2A) Are you currently living with your partner?                                                                     |
| V2AF03  | V2A  |      | 2        | Onehot | 0.0007  | (V2A) What is your current marital status?                                                                            |
| V2AF04  | V2A  |      | -1       | Onehot | 0.0048  | (V2A) Is your mother of Hispanic or Latino origin or descent?                                                         |
| V2AF13  | V2A  |      | 2        | Mean   | 0.0283  | (V2A) How old is the father of the baby? - years                                                                      |
| V2AG01  | V2A  |      | -1       | Onehot | 0.0017  | (V2A) If you feel you have been treated unfairly, do you usually accept it as a fact of life and keep it to yourself? |
| V2AG02  | V2A  |      | -1       | Onehot | 0.0019  | (V2A) If you have been treated unfairly, do you usually talk to people or keep it to yourself?                        |

| NAME                       | FILE | RULE   | TEMPORAL | IMPUTE | MISSING | DESCRIPTION                                                                                                             |
|----------------------------|------|--------|----------|--------|---------|-------------------------------------------------------------------------------------------------------------------------|
| <b>V1A PATIENT RACE</b>    | V1A  | ONEHOT | -1       | Onehot |         |                                                                                                                         |
| V1AF07a                    | V1A  |        | -1       |        | 0.0004  | (V1A) Racial background - White                                                                                         |
| V1AF07b                    | V1A  |        | -1       |        | 0.0004  | (V1A) Racial background - Black, African American or African Descent                                                    |
| V1AF07c                    | V1A  |        | -1       |        | 0.0004  | (V1A) Racial background - American Indian or Alaska Native                                                              |
| V1AF07d                    | V1A  |        | -1       |        | 0.0004  | (V1A) Racial background - Asian Indian                                                                                  |
| V1AF07e                    | V1A  |        | -1       |        | 0.0004  | (V1A) Racial background - Other Asian                                                                                   |
| V1AF07f                    | V1A  |        | -1       |        | 0.0004  | (V1A) Racial background - Native Hawaiian or Other Pacific Islander                                                     |
| V1AF07g                    | V1A  |        | -1       |        | 0.0004  | (V1A) Racial background - Other                                                                                         |
| <b>V1A HEALTHCARE</b>      | V1A  | ONEHOT | 1        | Onehot |         |                                                                                                                         |
| V1AF15a                    | V1A  |        | 1        |        | 0       | (V1A) How is your health care currently paid for? - Government insurance (federal, state, or local)                     |
| V1AF15b                    | V1A  |        | 1        |        | 0       | (V1A) How is your health care currently paid for? - Military insurance (Veteran's Administration or active duty)        |
| V1AF15c                    | V1A  |        | 1        |        | 0       | (V1A) How is your health care currently paid for? - Commercial health insurance/Commercial HMO                          |
| V1AF15d                    | V1A  |        | 1        |        | 0       | (V1A) How is your health care currently paid for? - Personal household income                                           |
| V1AF15e                    | V1A  |        | 1        |        | 0       | (V1A) How is your health care currently paid for? - Other                                                               |
| V1AF15f                    | V1A  |        | 1        |        | 0       | (V1A) How is your health care currently paid for? - Don't know                                                          |
| V1AF15g                    | V1A  |        | 1        |        | 0       | (V1A) How is your health care currently paid for? - Refused                                                             |
| <b>V1A PARTNER SUPPORT</b> | V1A  | ADD    | 1        | Onehot |         |                                                                                                                         |
| V1AF03a1                   | V1A  |        | 1        |        | 0.0584  | (V1A) What support do you expect your partner to give you during this pregnancy? - Emotional support                    |
| V1AF03a2                   | V1A  |        | 1        |        | 0.0584  | (V1A) What support do you expect your partner to give you during this pregnancy? - Financial support                    |
| V1AF03a3                   | V1A  |        | 1        |        | 0.0584  | (V1A) What support do you expect your partner to give you during this pregnancy? - To be present for my prenatal visits |
| V1AF03a4                   | V1A  |        | 1        |        | 0.0584  | (V1A) What support do you expect your partner to give you during this pregnancy? - To be present for the delivery       |

| NAME                   | FILE | RULE   | TEMPORAL | IMPUTE | MISSING | DESCRIPTION                                                                                                      |
|------------------------|------|--------|----------|--------|---------|------------------------------------------------------------------------------------------------------------------|
| <b>V2A HEALTHCARE</b>  | V2A  | ONEHOT | 2        | Onehot |         |                                                                                                                  |
| V2AF01a                | V2A  |        | 2        |        | 0.0005  | (V2A) How is your health care currently paid for? - Government insurance (federal, state, or local)              |
| V2AF01b                | V2A  |        | 2        |        | 0.0005  | (V2A) How is your health care currently paid for? - Military insurance (Veteran's Administration or active duty) |
| V2AF01c                | V2A  |        | 2        |        | 0.0005  | (V2A) How is your health care currently paid for? - Commercial health insurance/Commercial HMO                   |
| V2AF01d                | V2A  |        | 2        |        | 0.0005  | (V2A) How is your health care currently paid for? - Personal household income                                    |
| V2AF01e                | V2A  |        | 2        |        | 0.0005  | (V2A) How is your health care currently paid for? - Other                                                        |
| V2AF01f                | V2A  |        | 2        |        | 0.0005  | (V2A) How is your health care currently paid for? - Don't know                                                   |
| V2AF01g                | V2A  |        | 2        |        | 0.0005  | (V2A) How is your health care currently paid for? - Refused                                                      |
| <b>V2A MOTHER RACE</b> | V2A  | ONEHOT | -1       | Onehot |         |                                                                                                                  |
| V2AF05a                | V2A  |        | -1       |        | 0.0006  | (V2A) Mother's racial background - White                                                                         |
| V2AF05b                | V2A  |        | -1       |        | 0.0006  | (V2A) Mother's racial background - Black, African American or African Descent                                    |
| V2AF05c                | V2A  |        | -1       |        | 0.0006  | (V2A) Mother's racial background - American Indian or Alaska Native                                              |
| V2AF05d                | V2A  |        | -1       |        | 0.0006  | (V2A) Mother's racial background - Asian or Asian Indian                                                         |
| V2AF05e                | V2A  |        | -1       |        | 0.0006  | (V2A) Mother's racial background - Native Hawaiian or Other Pacific Islander                                     |
| V2AF05f                | V2A  |        | -1       |        | 0.0006  | (V2A) Mother's racial background - Other                                                                         |
| V2AF05g                | V2A  |        | -1       |        | 0.0006  | (V2A) Mother's racial background - Don't know                                                                    |
| V2AF05h                | V2A  |        | -1       |        | 0.0006  | (V2A) Mother's racial background - Refused                                                                       |
| <b>V2A FATHER RACE</b> | V2A  | ONEHOT | -1       | Onehot |         |                                                                                                                  |
| V2AF08a                | V2A  |        | -1       |        | 0.0007  | (V2A) Father's racial background - White                                                                         |
| V2AF08b                | V2A  |        | -1       |        | 0.0007  | (V2A) Father's racial background - Black, African American or African Descent                                    |
| V2AF08c                | V2A  |        | -1       |        | 0.0007  | (V2A) Father's racial background - American Indian or Alaska Native                                              |
| V2AF08d                | V2A  |        | -1       |        | 0.0007  | (V2A) Father's racial background - Asian or Asian Indian                                                         |
| V2AF08e                | V2A  |        | -1       |        | 0.0007  | (V2A) Father's racial background - Native Hawaiian or Other Pacific Islander                                     |
| V2AF08f                | V2A  |        | -1       |        | 0.0007  | (V2A) Father's racial background - Other                                                                         |
| V2AF08f.LSP            | V2A  |        | -1       |        | 0.8986  | (V2A) Father's racial background - Other, specify                                                                |
| V2AF08g                | V2A  |        | -1       |        | 0.0007  | (V2A) Father's racial background - Don't know                                                                    |
| V2AF08h                | V2A  |        | -1       |        | 0.0007  | (V2A) Father's racial background - Refused                                                                       |

| NAME                          | FILE | RULE | TEMPORAL | IMPUTE | MISSING | DESCRIPTION                                                                                                                                                                                                            |
|-------------------------------|------|------|----------|--------|---------|------------------------------------------------------------------------------------------------------------------------------------------------------------------------------------------------------------------------|
| <b>V2A<br/>DISCRIMINATION</b> | V2A  | ADD  | -1       | Mean   |         |                                                                                                                                                                                                                        |
| V2AG02                        | V2A  |      | -1       |        | 0.0019  | (V2A) If you have been treated unfairly, do you usually talk to people or keep it for yourself                                                                                                                         |
| V2AG03a                       | V2A  |      | -1       |        | 0.0017  | (V2A) Have you ever experienced discrimination, been prevented from doing something, or been hassled or made to feel inferior in any of the following situations because of your race, ethnicity, or color: at school? |
| V2AG03b                       | V2A  |      | -1       |        | 0.0017  | (V2A) ' ' Getting hired or getting a job?                                                                                                                                                                              |
| V2AG03c                       | V2A  |      | -1       |        | 0.0017  | (V2A) ' ' At work?                                                                                                                                                                                                     |
| V2AG03d                       | V2A  |      | -1       |        | 0.0017  | (V2A) ' ' Getting housing?                                                                                                                                                                                             |
| V2AG03e                       | V2A  |      | -1       |        | 0.0017  | (V2A) ' ' Getting medical care?                                                                                                                                                                                        |
| V2AG03f                       | V2A  |      | -1       |        | 0.0017  | (V2A) ' ' Getting service in a store or restaurant?                                                                                                                                                                    |
| V2AG03g                       | V2A  |      | -1       |        | 0.0017  | (V2A) ' ' Getting credit, bank loans, or a mortgage?                                                                                                                                                                   |
| V2AG03h                       | V2A  |      | -1       |        | 0.0018  | (V2A) ' ' On the street or in a public setting?                                                                                                                                                                        |
| V2AG03i                       | V2A  |      | -1       |        | 0.0018  | (V2A) ' ' From the police or in the courts?                                                                                                                                                                            |

#### Demographics Filtering



## 6.6 Physiology

The physiology filtering includes questions regarding the current and recent physiological health and questioning of the patient. This includes factors such as temperature, weight, body measurements, flu-like symptoms, nausea, blood pressure, and recent evidence of contractions or vaginal bleeding.

**Total # Features:** 115

**Layer 1 # Features:** 38

**Layer 2 # Features:** 38

**Relevant Files:** CMA, CMB, Demographics (ancillary), V1A, V1B, V2A, V2B, V3A, V3B, V4A

**Dropped Features:** For this group, we chose to exclude features that were detail oriented to questions that were asked earlier in the questionnaire. For example, details on flu-like illness symptoms were dropped, while the general question on if any such illness was present was kept, as the general question implicitly covers the presence of a response in the details that follow. Certain details were added back within L2, such as contraction and vaginal bleeding times. Multiple measurements of the same region were averaged into a single feature. Maximum, rather than average, blood pressure and temperature on admission were kept as they were deemed a better representation of potential risk or medical issues. Metadata features were used to organize data and later dropped.

| NAME     | FILE                     | RULE | TEMPORAL    | IMPUTE | MISSINGNESS | DESCRIPTION                                                                                                                   |
|----------|--------------------------|------|-------------|--------|-------------|-------------------------------------------------------------------------------------------------------------------------------|
| CMBC02b1 | CMB                      | Date | Abstraction | Mean   | 0.0266      | (CMB) Blood pressure - Highest systolic blood pressure during stay (mmHg),                                                    |
| CMBC02b2 | CMB                      | Date | Abstraction | Mean   | 0.0266      | (CMB) Blood pressure - Highest diastolic blood pressure during stay (mmHg),                                                   |
| BMLCat   | demographics (ancillary) | 1    |             | Bmicat | 0.0225      | BMI category (kg/m <sup>2</sup> ) at visit 1 calculated from height and weight (form V1B)                                     |
| V1AD06   | V1A                      | 1    |             | Any    | 0.0004      | (V1A) Have you had any 'flu-like illnesses,' 'really bad colds,' fever, a rash , or any muscle or joint aches since you       |
| V1AD07   | V1A                      | 1    |             | Mode   | 0.0008      | (V1A) Have you had any cramping since you became pregnant?                                                                    |
| V1AD08   | V1A                      | 1    |             | Multi  | 0.0005      | (V1A) Since you became pregnant, have you had vaginal bleeding more than spotting?                                            |
| V1AD09   | V1A                      | 1    |             | Mode   | 0.0004      | (V1A) In the last 12 hours, for how many hours have you felt nauseated?                                                       |
| V1AD10   | V1A                      | 1    |             | Mode   | 0.0003      | (V1A) In the last 12 hours, how many times have you vomited?                                                                  |
| V1AD11   | V1A                      | 1    |             | Mode   | 0.0003      | (V1A) In the last 12 hours, how many times have you had retching or dry heaves without emesis (vomiting)?                     |
| V2AD01   | V2A                      | 2    |             | Any    | 0.0008      | (V2A) Have you had any 'flu-like illnesses,' 'really bad colds,' fever, a rash, or any muscle or joint aches since last study |
| V2AD02   | V2A                      | 2    |             | Single | 0.001       | (V2A) Have you had any cramping/contractions since last study visit?                                                          |
| V2AD03   | V2A                      | 2    |             | Multi  | 0.001       | (V2A) Since last study visit, have you had vaginal bleeding more than spotting?                                               |
| V2AD04   | V2A                      | 2    |             | Mode   | 0.0012      | (V2A) In the last 12 hours, for how many hours have you felt nauseated?                                                       |
| V2AD05   | V2A                      | 2    |             | Mode   | 0.0012      | (V2A) In the last 12 hours, how many times have you vomited?                                                                  |
| V2AD06   | V2A                      | 2    |             | Mode   | 0.0013      | (V2A) In the last 12 hours, how many times have you had retching or dry heaves without emesis (vomiting)?                     |
| V3AD01   | V3A                      | 3    |             | Any    | 0.0001      | (V3A) Have you had any 'flu-like illnesses,' 'really bad colds,' fever, a rash, or any muscle or joint aches since last study |
| V3AD02   | V3A                      | 3    |             | Single | 0.0002      | (V3A) Have you had any cramping/contractions since last study visit?                                                          |
| V3AD03   | V3A                      | 3    |             | Multi  | 0.0009      | (V3A) Since last study visit, have you had vaginal bleeding more than spotting?                                               |
| V3AD04   | V3A                      | 3    |             | Mode   | 0.0007      | (V3A) In the last 12 hours, for how many hours have you felt nauseated?                                                       |
| V3AD05   | V3A                      | 3    |             | Mode   | 0.0007      | (V3A) In the last 12 hours, how many times have you vomited?                                                                  |
| V3AD06   | V3A                      | 3    |             | Mode   | 0.0007      | (V3A) In the last 12 hours, how many times have you had retching or dry heaves without emesis (vomiting)?                     |
| V4AE01   | V4A                      | 4    |             | Any    | 0.0001      | (V4A) Did you have any 'flu-like illnesses,' 'really bad colds,' fever, a rash, or any muscle or joint aches between date of  |

| NAME                                   | FILE | RULE   | TEMPORAL         | IMPUTE | MISSINGNESS | DESCRIPTION                                                                   |
|----------------------------------------|------|--------|------------------|--------|-------------|-------------------------------------------------------------------------------|
| <b>V1B_Resting_BP_Sys</b>              | V1B  | Mean   | 1                | Mean   |             |                                                                               |
| V1BA06a1                               | V1B  |        |                  |        | 0.0092      | (V1B) Resting blood pressure - Systolic (mm Hg) measure 1                     |
| V1BA06a2                               | V1B  |        |                  |        | 0.9749      | (V1B) Resting blood pressure - Systolic (mm Hg) measure 2                     |
| <b>V1B_Resting_BP_Dia</b>              | V1B  | Mean   | 1                | Mean   |             |                                                                               |
| V1BA06b1                               | V1B  |        |                  |        | 0.0092      | (V1B) Resting blood pressure - Diastolic (mm Hg) measure 1                    |
| V1BA06b2                               | V1B  |        |                  |        | 0.9749      | (V1B) Resting blood pressure - Diastolic (mm Hg) measure 2                    |
| <b>V1B_Neck_Circ</b>                   | V1B  | Mean   | 1                | Mean   |             |                                                                               |
| V1BA07a                                | V1B  |        |                  |        | 0.1392      | (V1B) Neck circumference - Measure 1 (cm)                                     |
| V1BA07b                                | V1B  |        |                  |        | 0.1442      | (V1B) Neck circumference - Measure 2 (cm)                                     |
| V1BA07c                                | V1B  |        |                  |        | 0.9924      | (V1B) Neck circumference - Measure 3 (cm)                                     |
| <b>V2B_Weight_lbs</b>                  | V2B  | Mean   | 2                | Mean   |             |                                                                               |
| V2BA01_KG                              | V2B  |        |                  |        | 0.8669      | (V2B) Weight - kg                                                             |
| V2BA01_LB                              | V2B  |        |                  |        | 0.1361      | (V2B) Weight - lbs                                                            |
| <b>V2B_Resting_BP_Sys</b>              | V2B  | Mean   | 2                | Mean   |             |                                                                               |
| V2BA02a1                               | V2B  |        |                  |        | 0.006       | (V2B) Resting blood pressure - Systolic measure 1 (mmHg)                      |
| V2BA02a2                               | V2B  |        |                  |        | 0.9806      | (V2B) Resting blood pressure - Systolic measure 2 (mmHg)                      |
| <b>V2B_Resting_BP_Dia</b>              | V2B  | Mean   | 2                | Mean   |             |                                                                               |
| V2BA02b1                               | V2B  |        |                  |        | 0.006       | (V2B) Resting blood pressure - Diastolic measure 1 (mmHg)                     |
| V2BA02b2                               | V2B  |        |                  |        | 0.9808      | (V2B) Resting blood pressure - Diastolic measure 2 (mmHg)                     |
| <b>V3B_Weight_lbs</b>                  | V3B  | Weight | 3                | Mean   |             |                                                                               |
| V3BA01_KG                              | V3B  |        |                  |        | 0.8675      | (V3B) Weight - kg                                                             |
| V3BA01_LB                              | V3B  |        |                  |        | 0.1352      | (V3B) Weight - lbs                                                            |
| <b>V3B_Resting_BP_Sys</b>              | V3B  | Mean   | 3                | Mean   |             |                                                                               |
| V3BA02a1                               | V3B  |        |                  |        | 0.0052      | (V3B) Resting blood pressure - Systolic measure 1 (mmHg)                      |
| V3BA02a2                               | V3B  |        |                  |        | 0.9763      | (V3B) Resting blood pressure - Systolic measure 2 (mmHg)                      |
| <b>V3B_Resting_BP_Dia</b>              | V3B  | Mean   | 3                | Mean   |             |                                                                               |
| V3BA02b1                               | V3B  |        |                  |        | 0.0052      | (V3B) Resting blood pressure - Diastolic measure 1 (mmHg)                     |
| V3BA02b2                               | V3B  |        |                  |        | 0.9763      | (V3B) Resting blood pressure - Diastolic measure 2 (mmHg)                     |
| <b>CMA_Weight_Pre-Delivery_lbs</b>     | CMA  | Weight | 4                | Mean   |             |                                                                               |
| CMA01a1                                | CMA  |        |                  |        | 0.5736      | (CMA) Participant's last weight prior to delivery - kilograms                 |
| CMA01a2                                | CMA  |        |                  |        | 0.4468      | (CMA) Participant's last weight prior to delivery - pounds                    |
| <b>CMB_Max_Admission_Temp</b>          | CMB  | Temp   | Date Abstraction | Mean   |             |                                                                               |
| CMBC01b1                               | CMB  |        |                  |        | 0.481       | (CMB) Maximum temperature during admission or encounter - degrees Celsius,    |
| CMBC01b2                               | CMB  |        |                  |        | 0.5494      | (CMB) Maximum temperature during admission or encounter - degrees Fahrenheit, |
| <b>V1B_Weight_lbs</b>                  | V1B  | Weight | 1                | Mean   |             |                                                                               |
| V1BA01_KG                              | V1B  |        |                  |        | 0.8577      | (V1B) Weight - kg                                                             |
| V1BA01_LB                              | V1B  |        |                  |        | 0.1439      | (V1B) Weight - lbs                                                            |
| <b>V1B_Height</b>                      | V1B  | Mean   | 1                | Mean   |             |                                                                               |
| V1BA02a                                | V1B  |        |                  |        | 0.0093      | (V1B) Height - Measure 1 (cm)                                                 |
| V1BA02b                                | V1B  |        |                  |        | 0.0229      | (V1B) Height - Measure 2 (cm)                                                 |
| V1BA02c                                | V1B  |        |                  |        | 0.992       | (V1B) Height - Measure 3 (cm)                                                 |
| <b>V1B_Natural_Waist-Circumference</b> | V1B  | Mean   | 1                | Mean   |             |                                                                               |
| V1BA03a                                | V1B  |        |                  |        | 0.0183      | (V1B) Natural waist circumference - Measure 1 (cm)                            |
| V1BA03b                                | V1B  |        |                  |        | 0.0233      | (V1B) Natural waist circumference - Measure 2 (cm)                            |
| V1BA03c                                | V1B  |        |                  |        | 0.9745      | (V1B) Natural waist circumference - Measure 3 (cm)                            |
| <b>V1B_Waist_Lilac_Crest</b>           | V1B  | Mean   | 1                | Mean   |             |                                                                               |
| V1BA04a                                | V1B  |        |                  |        | 0.0184      | (V1B) Waist circumference over iliac crest - Measure 1 (cm)                   |
| V1BA04b                                | V1B  |        |                  |        | 0.0234      | (V1B) Waist circumference over iliac crest - Measure 2 (cm)                   |
| V1BA04c                                | V1B  |        |                  |        | 0.9721      | (V1B) Waist circumference over iliac crest - Measure 3 (cm)                   |
| <b>V1B_Hip_Circ</b>                    | V1B  | Mean   | 1                | Mean   |             |                                                                               |
| V1BA04a                                | V1B  |        |                  |        | 0.0189      | (V1B) Hip circumference - Measure 1 (cm)                                      |
| V1BA04b                                | V1B  |        |                  |        | 0.0238      | (V1B) Hip circumference - Measure 2 (cm)                                      |
| V1BA04c                                | V1B  |        |                  |        | 0.9768      | (V1B) Hip circumference - Measure 3 (cm)                                      |

## 6.7 Ultrasound

The ultrasound filtering group contains all features located within the ultrasound related files and chart abstractions. This includes fetal measurements, uterine artery analysis, adrenal gland study, noted conditions, amniotic fluid information, and more.

**Total # Features:** 542

**Layer 1 # Features:** 59

**Layer 2 # Features:** 131

**Relevant Files:** CUA, CUB, S02, U02, U1C, U2A, U2B, U2C, U3A, U3B, U3C, U3D

**Dropped Features:** For this group, there were many excess features that were dropped (100% missingness), for noted abnormalities. Abnormality code was the only feature used to represent fetal abnormalities. There was abundant metadata relevant only for either organizing data or populating other features and therefore redundant, which was dropped. Details for conditions were left for Layer 2, as were detailed measurements in the uterine artery.

| NAME     | FILE | RULE | TEMP | IMPUTE | MISSING | DESCRIPTION                                                                                                       |
|----------|------|------|------|--------|---------|-------------------------------------------------------------------------------------------------------------------|
| CUAB02a2 | CUA  |      | 1    | 999    | 0.9855  | (CUA) Brain Abnormality - Code (a)                                                                                |
| CUAC02a2 | CUA  |      | 1    | 999    | 0.9981  | (CUA) Head/neck abnormality - Code (a)                                                                            |
| CUAD02a2 | CUA  |      | 1    | 999    | 0.9868  | (CUA) Chest abnormality - Code (a)                                                                                |
| CUAD02b2 | CUA  |      | 1    | 999    | 0.9987  | (CUA) Chest abnormality - Code (b)                                                                                |
| CUAD02c2 | CUA  |      | 1    | 999    | 0.9994  | (CUA) Chest abnormality - Code (c)                                                                                |
| CUAE02a2 | CUA  |      | 1    | 999    | 0.9779  | (CUA) Abdomen abnormality - Code (a)                                                                              |
| CUAE02b2 | CUA  |      | 1    | 999    | 0.9981  | (CUA) Abdomen abnormality - Code (b)                                                                              |
| CUAF02a2 | CUA  |      | 1    | 999    | 0.9975  | (CUA) Extremities abnormality - Code (a)                                                                          |
| CUAH02a2 | CUA  |      | 1    | 999    | 0.9924  | (CUA) Malformation(s) not mentioned under brain, head/neck, chest, abdomen, extremities or spine - Code (a)       |
| CUAH02b2 | CUA  |      | 1    | 999    | 0.9987  | (CUA) Malformation(s) not mentioned under brain, head/neck, chest, abdomen, extremities or spine - Code (b)       |
| CUBB01   | CUB  |      | 1    | 999    | 0.0008  | (CUB) Were any structural abnormalities detected?                                                                 |
| CUBB02a2 | CUB  |      | 1    | 999    | 0.9417  | (CUB) Abnormality - Code (a)                                                                                      |
| CUBB02b2 | CUB  |      | 1    | 999    | 0.9935  | (CUB) Abnormality - Code (b)                                                                                      |
| CUBB02c2 | CUB  |      | 1    | 999    | 0.9974  | (CUB) Abnormality - Code (c)                                                                                      |
| CUBB02d2 | CUB  |      | 1    | 999    | 0.9987  | (CUB) Abnormality - Code (d)                                                                                      |
| CUBB02e2 | CUB  |      | 1    | 999    | 0.9992  | (CUB) Abnormality - Code (e)                                                                                      |
| CUBB02f2 | CUB  |      | 1    | 999    | 0.9997  | (CUB) Abnormality - Code (f)                                                                                      |
| U1CB02   | U1C  |      | 1    | ANY    | 0.0014  | (U1C) Disclosable condition                                                                                       |
| U1CB04c  | U1C  |      | 1    | 999    | 0.9971  | (U1C) Disclosable condition reported - Incidental detection of complete or partial placenta previa or vasa previa |
| U1CC04   | U1C  |      | 1    | MEAN   | 0.0287  | (U1C) Left Uterine Artery - Peak Systolic Velocity (PSV) (cm/sec)                                                 |
| U1CC05   | U1C  |      | 1    | MEAN   | 0.0337  | (U1C) Left Uterine Artery - Systolic/Diastolic Ratio (S/D)                                                        |
| U1CC06   | U1C  |      | 1    | MEAN   | 0.0294  | (U1C) Left Uterine Artery - Resistance Index (RI)                                                                 |
| U1CC07   | U1C  |      | 1    | MEAN   | 0.0309  | (U1C) Left Uterine Artery - Pulsatility Index (PI)                                                                |
| U1CC09   | U1C  |      | 1    | 999    | 0.0266  | (U1C) Left Uterine Artery - Early diastolic notch present                                                         |
| U1CC12   | U1C  |      | 1    | 999    | 0.023   | (U1C) Left Uterine Artery - Systolic notch present                                                                |
| U1CD04   | U1C  |      | 1    | MEAN   | 0.0345  | (U1C) Right Uterine Artery - Peak Systolic Velocity (PSV) (cm/sec)                                                |
| U1CD05   | U1C  |      | 1    | MEAN   | 0.0402  | (U1C) Right Uterine Artery - Systolic/Diastolic Ratio (S/D)                                                       |
| U1CD06   | U1C  |      | 1    | MEAN   | 0.0345  | (U1C) Right Uterine Artery - Resistance Index (RI)                                                                |
| U1CD07   | U1C  |      | 1    | MEAN   | 0.0359  | (U1C) Right Uterine Artery - Pulsatility Index (PI)                                                               |
| U1CD09   | U1C  |      | 1    | 999    | 0.0302  | (U1C) Right Uterine Artery - Early diastolic notch present                                                        |
| U1CD12   | U1C  |      | 1    | 999    | 0.0294  | (U1C) Right Uterine Artery - Systolic notch present                                                               |
| U2AB02   | U2A  |      | 2    | MEAN   | 0.0113  | (U2A) Biparietal Diameter - cm                                                                                    |
| U2AB03   | U2A  |      | 2    | MEAN   | 0.011   | (U2A) Head Circumference - cm                                                                                     |
| U2AB04   | U2A  |      | 2    | MEAN   | 0.0115  | (U2A) Abdominal Circumference - cm                                                                                |
| U2AB05   | U2A  |      | 2    | MEAN   | 0.0106  | (U2A) Femur Diaphysis Length - cm                                                                                 |
| U2AB06   | U2A  |      | 2    | MEAN   | 0.1167  | (U2A) Estimated fetal weight as reported - grams                                                                  |
| U2AB07   | U2A  |      | 2    | N/A    | 0.595   | (U2A) Estimated fetal weight percentile as reported - percentile                                                  |
| U2AC01   | U2A  |      | 2    | ANY    | 0.4733  | (U2A) Disclosable condition                                                                                       |
| U2AC03c  | U2A  |      | 2    | 999    | 0.9871  | (U2A) Disclosable condition reported - Incidental finding of oligohydramnios                                      |
| U2AC03e  | U2A  |      | 2    | 999    | 0.9871  | (U2A) Disclosable condition reported - Incidental detection of complete or partial placenta previa or vasa previa |
| U2BB02   | U2B  |      | 2    | NEG1   | 0.0208  | (U2B) Cervical length - mm                                                                                        |
| U2BB03   | U2B  |      | 2    | 999    | 0.0051  | (U2B) Funnel                                                                                                      |
| U2BB04   | U2B  |      | 2    | NEG1   | 0.9944  | (U2B) Funnel length - mm                                                                                          |
| U2BB05   | U2B  |      | 2    | 999    | 0.0059  | (U2B) Debris                                                                                                      |

| NAME                        | FILE | RULE                 | TEMP | IMPUTE  | MISSING | DESCRIPTION                                                                                                       |
|-----------------------------|------|----------------------|------|---------|---------|-------------------------------------------------------------------------------------------------------------------|
| U2BC01                      | U2B  |                      | 2    | ANY     | 0.1082  | (U2B) Disclosable condition                                                                                       |
| U2BC03d                     | U2B  |                      | 2    | 999     | 0.9815  | (U2B) Disclosable condition reported - Incidental detection of complete or partial placenta previa or vasa previa |
| U2CB03                      | U2C  |                      | 2    | ANY     | 0       | (U2C) Disclosable condition reported                                                                              |
| U2CB04c                     | U2C  |                      | 2    | 999     | 0.9825  | (U2C) Disclosable condition reported - Incidental detection of complete or partial placenta previa or vasa previa |
| U2CC04                      | U2C  |                      | 2    | MEAN    | 0.0167  | (U2C) Left Uterine Artery - Peak Systolic Velocity (PSV) (cm/sec)                                                 |
| U2CC05                      | U2C  |                      | 2    | MEAN    | 0.0191  | (U2C) Left Uterine Artery - Systolic/Diastolic Ratio (S/D)                                                        |
| U2CC06                      | U2C  |                      | 2    | MEAN    | 0.0171  | (U2C) Left Uterine Artery - Resistance Index (RI)                                                                 |
| U2CC07                      | U2C  |                      | 2    | MEAN    | 0.0188  | (U2C) Left Uterine Artery - Pulsatility Index (PI)                                                                |
| U2CC09                      | U2C  |                      | 2    | 999     | 0.0146  | (U2C) Left Uterine Artery - Early diastolic notch present                                                         |
| U2CC12                      | U2C  |                      | 2    | 999     | 0.016   | (U2C) Left Uterine Artery - Systolic notch present                                                                |
| U2CD04                      | U2C  |                      | 2    | MEAN    | 0.0151  | (U2C) Right Uterine Artery - Peak Systolic Velocity (PSV) (cm/sec)                                                |
| U2CD05                      | U2C  |                      | 2    | MEAN    | 0.0182  | (U2C) Right Uterine Artery - Systolic/Diastolic Ratio (S/D)                                                       |
| U2CD06                      | U2C  |                      | 2    | MEAN    | 0.0151  | (U2C) Right Uterine Artery - Resistance Index (RI)                                                                |
| U2CD07                      | U2C  |                      | 2    | MEAN    | 0.0164  | (U2C) Right Uterine Artery - Pulsatility Index (PI)                                                               |
| U2CD09                      | U2C  |                      | 2    | 999     | 0.0131  | (U2C) Right Uterine Artery - Early diastolic notch present                                                        |
| U2CD12                      | U2C  |                      | 2    | 999     | 0.0148  | (U2C) Right Uterine Artery - Systolic notch present                                                               |
| U3AB02                      | U3A  |                      | 3    | MEAN    | 0.0077  | (U3A) Biparietal Diameter (cm)                                                                                    |
| U3AB03                      | U3A  |                      | 3    | MEAN    | 0.0076  | (U3A) Head Circumference (cm)                                                                                     |
| U3AB04                      | U3A  |                      | 3    | MEAN    | 0.0064  | (U3A) Abdominal Circumference (cm)                                                                                |
| U3AB05                      | U3A  |                      | 3    | MEAN    | 0.0068  | (U3A) Femur Diaphysis Length (cm)                                                                                 |
| U3AB07                      | U3A  |                      | 3    | MEAN    | 0.0127  | (U3A) Estimated fetal weight as reported - grams                                                                  |
| U3AC01                      | U3A  |                      | 3    | ANY     | 0.0437  | (U3A) Disclosable condition                                                                                       |
| U3AC03c                     | U3A  |                      | 3    | SUM.LEQ | 0.9915  | (U3A) Disclosable condition reported - Oligohydramnios (maximal vertical pocket of <2 cm or AFI <5 cm)            |
| U3AC03e                     | U3A  |                      | 3    | 999     | 0.9915  | (U3A) Disclosable condition reported - Incidental detection of complete or partial placenta previa or vasa previa |
| U3BB02                      | U3B  |                      | 3    | NEG1    | 0.0152  | (U3B) Cervical length - mm                                                                                        |
| U3BB03                      | U3B  |                      | 3    | 999     | 0.0052  | (U3B) Funnel                                                                                                      |
| U3BB04                      | U3B  |                      | 3    | NEG1    | 0.9799  | (U3B) Funnel length - mm                                                                                          |
| U3BB05                      | U3B  |                      | 3    | 999     | 0.0064  | (U3B) Debris                                                                                                      |
| U3BC01                      | U3B  |                      | 3    | ANY     | 0.0122  | (U3B) Disclosable condition                                                                                       |
| U3BC03d                     | U3B  |                      | 3    | 999     | 0.984   | (U3B) Disclosable condition reported - Incidental detection of complete or partial placenta previa or vasa previa |
| U3CB02                      | U3C  |                      | 3    | ANY     | 0.0009  | (U3C) Disclosable condition                                                                                       |
| U3CB04c                     | U3C  |                      | 3    | 999     | 0.9954  | (U3C) Disclosable condition reported - Incidental detection of complete or partial placenta previa or vasa previa |
| U3CC04                      | U3C  |                      | 3    | MEAN    | 0.0271  | (U3C) Left Uterine Artery - Peak Systolic Velocity (PSV) (cm/sec)                                                 |
| U3CC05                      | U3C  |                      | 3    | MEAN    | 0.0271  | (U3C) Left Uterine Artery - Systolic/Diastolic Ratio (S/D)                                                        |
| U3CC06                      | U3C  |                      | 3    | MEAN    | 0.0264  | (U3C) Left Uterine Artery - Resistance Index (RI)                                                                 |
| U3CC07                      | U3C  |                      | 3    | MEAN    | 0.0266  | (U3C) Left Uterine Artery - Pulsatility Index (PI)                                                                |
| U3CC09                      | U3C  |                      | 3    | 999     | 0.0243  | (U3C) Left Uterine Artery - Early diastolic notch present                                                         |
| U3CC12                      | U3C  |                      | 3    | 999     | 0.0254  | (U3C) Left Uterine Artery - Systolic notch present                                                                |
| U3CD04                      | U3C  |                      | 3    | MEAN    | 0.0259  | (U3C) Right Uterine Artery - Peak Systolic Velocity (PSV) (cm/sec)                                                |
| U3CD05                      | U3C  |                      | 3    | MEAN    | 0.0275  | (U3C) Right Uterine Artery - Systolic/Diastolic Ratio (S/D)                                                       |
| U3CD06                      | U3C  |                      | 3    | MEAN    | 0.0257  | (U3C) Right Uterine Artery - Resistance Index (RI)                                                                |
| U3CD07                      | U3C  |                      | 3    | MEAN    | 0.0264  | (U3C) Right Uterine Artery - Pulsatility Index (PI)                                                               |
| U3CD09                      | U3C  |                      | 3    | 999     | 0.0234  | (U3C) Right Uterine Artery - Early diastolic notch present                                                        |
| U3CD12                      | U3C  |                      | 3    | 999     | 0.0268  | (U3C) Right Uterine Artery - Systolic notch present                                                               |
| U3DC01                      | U3D  |                      | 3    | 999     | 0.0677  | (U3D) Fetal adrenal gland mass                                                                                    |
| U3DC02                      | U3D  |                      | 3    | 999     | 0.0004  | (U3D) Disclosable condition reported                                                                              |
| U3DD01                      | U3D  |                      | 3    | 999     | 0.0895  | (U3D) Fetal Adrenal Gland Measures Visit 3 - Which gland was used for measurement                                 |
| <b>Calc. Polyhydramnios</b> |      | Calc. Polyhydramnios | 3    |         |         |                                                                                                                   |
| U3AB06a                     | U3A  |                      | 3    | MEAN    | 0.0761  | (U3A) Amniotic Fluid Index (AFI) - Quadrant 1 (cm)                                                                |
| U3AB06b                     | U3A  |                      | 3    | MEAN    | 0.074   | (U3A) Amniotic Fluid Index (AFI) - Quadrant 2 (cm)                                                                |
| U3AB06c                     | U3A  |                      | 3    | MEAN    | 0.0736  | (U3A) Amniotic Fluid Index (AFI) - Quadrant 3 (cm)                                                                |
| U3AB06d                     | U3A  |                      | 3    | MEAN    | 0.0833  | (U3A) Amniotic Fluid Index (AFI) - Quadrant 4 (cm)                                                                |
| <b>adrenal_gland_length</b> |      | adrenal_measure      | 3    |         |         |                                                                                                                   |
| U3DD02a1                    | U3D  |                      | 3    | MEAN    | 0.1898  | (U3D) Adrenal Gland Measurements, Adrenal gland - Length in mm (1)                                                |
| U3DD02a2                    | U3D  |                      | 3    | MEAN    | 0.2111  | (U3D) Adrenal Gland Measurements, Adrenal gland - Length in mm (2)                                                |
| U3DD02a3                    | U3D  |                      | 3    | MEAN    | 0.257   | (U3D) Adrenal Gland Measurements, Adrenal gland - Length in mm (3)                                                |
| U3DD02a1                    | U3D  |                      | 3    | MEAN    | 0.9951  | (U3D) Repeat Adrenal Gland Measurements, Adrenal gland length in mm, Measure 1                                    |
| U3DF02a2                    | U3D  |                      | 3    | MEAN    | 0.9955  | (U3D) Repeat Adrenal Gland Measurements, Adrenal gland length in mm, Measure 2                                    |
| U3DF02a3                    | U3D  |                      | 3    | MEAN    | 0.9955  | (U3D) Repeat Adrenal Gland Measurements, Adrenal gland length in mm, Measure 3                                    |
| U3DD05                      | U3D  |                      | 3    | N/A     | 0.0579  | (U3D) Fetal Adrenal Gland Measures Visit 3 - Adrenal Glad measurements exam complete                              |
| U3DF05                      | U3D  |                      | 3    | N/A     | 0.9933  | (U3D) Repeat Adrenal Gland Measurements - Exam complete                                                           |

| NAME                       | FILE | RULE            | TEMP | IMPUTE | MISSING | DESCRIPTION                                                                          |
|----------------------------|------|-----------------|------|--------|---------|--------------------------------------------------------------------------------------|
| <hr/>                      |      |                 |      |        |         |                                                                                      |
| <b>fetal_zone_length</b>   |      | adrenal_measure | 3    |        |         |                                                                                      |
| U3DD02b1                   | U3D  |                 | 3    | MEAN   | 0.1906  | (U3D) Adrenal Gland Measurements, Fetal zone - Length in mm (1)                      |
| U3DD02b2                   | U3D  |                 | 3    | MEAN   | 0.212   | (U3D) Adrenal Gland Measurements, Fetal zone - Length in mm (2)                      |
| U3DD02b3                   | U3D  |                 | 3    | MEAN   | 0.2584  | (U3D) Adrenal Gland Measurements, Fetal zone - Length in mm (3)                      |
| U3DF02b1                   | U3D  |                 | 3    | MEAN   | 0.9951  | (U3D) Repeat Adrenal Gland Measurements, Fetal zone length in mm, Measure 1          |
| U3DF02b2                   | U3D  |                 | 3    | MEAN   | 0.9955  | (U3D) Repeat Adrenal Gland Measurements, Fetal zone length in mm, Measure 2          |
| U3DF02b3                   | U3D  |                 | 3    | MEAN   | 0.9955  | (U3D) Repeat Adrenal Gland Measurements, Fetal zone length in mm, Measure 3          |
| U3DD05                     | U3D  |                 | 3    | N/A    | 0.0579  | (U3D) Fetal Adrenal Gland Measures Visit 3 - Adrenal Glad measurements exam complete |
| U3DF05                     | U3D  |                 | 3    | N/A    | 0.9933  | (U3D) Repeat Adrenal Gland Measurements - Exam complete                              |
| <hr/>                      |      |                 |      |        |         |                                                                                      |
| <b>adrenal_gland_width</b> |      | adrenal_measure | 3    |        |         |                                                                                      |
| U3DD03a1                   | U3D  |                 | 3    | MEAN   | 0.1929  | (U3D) Adrenal Gland Measurements, Adrenal gland - Width in mm (1)                    |
| U3DD03a2                   | U3D  |                 | 3    | MEAN   | 0.2134  | (U3D) Adrenal Gland Measurements, Adrenal gland - Width in mm (2)                    |
| U3DD03a3                   | U3D  |                 | 3    | MEAN   | 0.2615  | (U3D) Adrenal Gland Measurements, Adrenal gland - Width in mm (3)                    |
| U3DF03a1                   | U3D  |                 | 3    | MEAN   | 0.9951  | (U3D) Repeat Adrenal Gland Measurements, Adrenal gland length in mm, Measure 1       |
| U3DF03a2                   | U3D  |                 | 3    | MEAN   | 0.9955  | (U3D) Repeat Adrenal Gland Measurements, Adrenal gland length in mm, Measure 2       |
| U3DF03a3                   | U3D  |                 | 3    | MEAN   | 0.9955  | (U3D) Repeat Adrenal Gland Measurements, Adrenal gland length in mm, Measure 3       |
| U3DD05                     | U3D  |                 | 3    | N/A    | 0.0579  | (U3D) Fetal Adrenal Gland Measures Visit 3 - Adrenal Glad measurements exam complete |
| U3DF05                     | U3D  |                 | 3    | N/A    | 0.9933  | (U3D) Repeat Adrenal Gland Measurements - Exam complete                              |
| <hr/>                      |      |                 |      |        |         |                                                                                      |
| <b>fetal_zone_width</b>    |      | adrenal_measure | 3    |        |         |                                                                                      |
| U3DD03b1                   | U3D  |                 | 3    | MEAN   | 0.1929  | (U3D) Adrenal Gland Measurements, Fetal zone - Width in mm (1)                       |
| U3DD03b2                   | U3D  |                 | 3    | MEAN   | 0.2143  | (U3D) Adrenal Gland Measurements, Fetal zone - Width in mm (2)                       |
| U3DD03b3                   | U3D  |                 | 3    | MEAN   | 0.2633  | (U3D) Adrenal Gland Measurements, Fetal zone - Width in mm (3)                       |
| U3DF03b1                   | U3D  |                 | 3    | MEAN   | 0.9951  | (U3D) Repeat Adrenal Gland Measurements, Fetal zone width in mm, Measure 1           |
| U3DF03b2                   | U3D  |                 | 3    | MEAN   | 0.9955  | (U3D) Repeat Adrenal Gland Measurements, Fetal zone width in mm, Measure 2           |
| U3DF03b3                   | U3D  |                 | 3    | MEAN   | 0.9955  | (U3D) Repeat Adrenal Gland Measurements, Fetal zone width in mm, Measure 3           |
| U3DD05                     | U3D  |                 | 3    | N/A    | 0.0579  | (U3D) Fetal Adrenal Gland Measures Visit 3 - Adrenal Glad measurements exam complete |
| U3DF05                     | U3D  |                 | 3    | N/A    | 0.9933  | (U3D) Repeat Adrenal Gland Measurements - Exam complete                              |

| NAME                       | FILE | RULE            | TEMP | IMPUTE | MISSING | DESCRIPTION                                                                          |
|----------------------------|------|-----------------|------|--------|---------|--------------------------------------------------------------------------------------|
| <b>adrenal_gland_depth</b> |      | adrenal_measure | 3    |        |         |                                                                                      |
| U3DD04a1                   | U3D  |                 | 3    | MEAN   | 0.7657  | (U3D) Adrenal Gland Measurements, Adrenal gland - Depth in mm (1)                    |
| U3DD04a2                   | U3D  |                 | 3    | MEAN   | 0.7679  | (U3D) Adrenal Gland Measurements, Adrenal gland - Depth in mm (2)                    |
| U3DD04a3                   | U3D  |                 | 3    | MEAN   | 0.7719  | (U3D) Adrenal Gland Measurements, Adrenal gland - Depth in mm (3)                    |
| U3DF04a1                   | U3D  |                 | 3    | MEAN   | 0.9982  | (U3D) Repeat Adrenal Gland Measurements, Adrenal gland depth in mm, Measure 1        |
| U3DF04a2                   | U3D  |                 | 3    | MEAN   | 0.9982  | (U3D) Repeat Adrenal Gland Measurements, Adrenal gland depth in mm, Measure 2        |
| U3DF04a3                   | U3D  |                 | 3    | MEAN   | 0.9982  | (U3D) Repeat Adrenal Gland Measurements, Adrenal gland depth in mm, Measure 3        |
| U3DD05                     | U3D  |                 | 3    | N/A    | 0.0579  | (U3D) Fetal Adrenal Gland Measures Visit 3 - Adrenal Glad measurements exam complete |
| U3DF05                     | U3D  |                 | 3    | N/A    | 0.9933  | (U3D) Repeat Adrenal Gland Measurements - Exam complete                              |
| <b>fetal_zone_depth</b>    |      | adrenal_measure | 3    |        |         |                                                                                      |
| U3DD04b1                   | U3D  |                 | 3    | MEAN   | 0.7657  | (U3D) Adrenal Gland Measurements, Fetal zone - Depth in mm (1)                       |
| U3DD04b2                   | U3D  |                 | 3    | MEAN   | 0.7679  | (U3D) Adrenal Gland Measurements, Fetal zone - Depth in mm (2)                       |
| U3DD04b3                   | U3D  |                 | 3    | MEAN   | 0.7719  | (U3D) Adrenal Gland Measurements, Fetal zone - Depth in mm (3)                       |
| U3DF04b1                   | U3D  |                 | 3    | MEAN   | 0.9982  | (U3D) Repeat Adrenal Gland Measurements, Fetal zone, depth in mm, Measure 1          |
| U3DF04b2                   | U3D  |                 | 3    | MEAN   | 0.9982  | (U3D) Repeat Adrenal Gland Measurements, Fetal zone, depth in mm, Measure 2          |
| U3DF04b3                   | U3D  |                 | 3    | MEAN   | 0.9982  | (U3D) Repeat Adrenal Gland Measurements, Fetal zone, depth in mm, Measure 3          |
| U3DD05                     | U3D  |                 | 3    | N/A    | 0.0579  | (U3D) Fetal Adrenal Gland Measures Visit 3 - Adrenal Glad measurements exam complete |
| U3DF05                     | U3D  |                 | 3    | N/A    | 0.9933  | (U3D) Repeat Adrenal Gland Measurements - Exam complete                              |

## 6.8 Medical History

The medical history filtering includes questions regarding the current or recent (prenatal labs) medical conditions of the patient, which is a quite large category. As a result, using literature review and clinician input, we narrowed down our relevant features to PTB-related factors like STI screens, gynecological infections, and diabetes/hypertension data. Aside from diagnostics, we also included prior information about previous pregnancy loss history, given the trial’s focus on nulliparous patients, as well as relevant CBC results like hematocrit levels, and patient previous procedures and pre-pregnancy weight.

**Total Features:** 2294

**Layer 1 Features:** 100

**Layer 2 Features:** 100

**Relevant Files:** CLA, CLB, CMA, CMB, CMD, CME, S02, V1A, VXX, demographics (ancillary), pregnancy\_outcomes (ancillary)

**Dropped Features:** For this group, we dropped most features due to a large amount of information. As a result, we focused on health conditions that pertained most to PTB risk factors.

Table 9: Medical History Filtering

| NAME      | FILE | RULE | TEMPORAL | IMPUTE | MISSING | DESCRIPTION                                                                                                        |
|-----------|------|------|----------|--------|---------|--------------------------------------------------------------------------------------------------------------------|
| CLAA01a   | CLA  |      | 1        | Mean   | 0.035   | (CLA) Complete blood count - Hemoglobin g/dL                                                                       |
| CLAA01b   | CLA  |      | 1        | Mean   | 0.0376  | (CLA) Complete blood count - Hematocrit %                                                                          |
| CLAA01d   | CLA  |      | 1        | Mean   | 0.0945  | (CLA) Complete blood count - Platelet count x10 <sup>3</sup> /mm <sup>3</sup> (x10 <sup>3</sup> 3L)                |
| CLAA06a2  | CLA  |      | 1        | Onehot | 0.8675  | (CLA) Urine culture - Organism code (a)                                                                            |
| CLAA06b2  | CLA  |      | 1        | Onehot | 0.9912  | (CLA) Urine culture - Organism code (b)                                                                            |
| CLAA07    | CLA  |      | 1        | Onehot | 0.1827  | (CLA) Gonorrheal screen                                                                                            |
| CLAA08    | CLA  |      | 1        | Onehot | 0.1751  | (CLA) Chlamydial screen                                                                                            |
| CLAA09    | CLA  |      | 1        | Onehot | 0.0535  | (CLA) VDRL/RPR (syphilis) test                                                                                     |
| CLAB02d2  | CLA  |      | 1        | Mean   | 0.5419  | (CLA) First trimester serum screen PAPP-A Results - Multiples of the median (MoM)                                  |
| CLAB02e2  | CLA  |      | 1        | Mean   | 0.5616  | (CLA) First trimester serum screen beta HCG - Multiples of the median (MoM)                                        |
| CLAC01c2  | CLA  |      | 2        | Mean   | 0.6079  | (CLA) Second trimester screen AFP Results - Multiples of the median (MoM)                                          |
| CLAC01d2  | CLA  |      | 2        | Mean   | 0.6848  | (CLA) Second trimester screen Total beta HCG Results - Multiples of the median (MoM)                               |
| CLAC01e2  | CLA  |      | 2        | Mean   | 0.6831  | (CLA) Second trimester screen uEstriol Results - Multiples of the median (MoM)                                     |
| CLAC01f2  | CLA  |      | 2        | Mean   | 0.6867  | (CLA) Inhibin A (DIA) Results - Multiples of the median (MoM)                                                      |
| CLAD01a2  | CLA  |      | 3        | Mean   | 0.1797  | (CLA) Third Trimester Lab Studies (>24 0 weeks) Blood count, Lowest hemoglobin during third trimester before labor |
| CLAD01b2  | CLA  |      | 3        | Mean   | 0.2049  | (CLA) Lowest hematocrit during third trimester before labor and delivery - Result %                                |
| CLAD02a   | CLA  |      | 3        | Onehot | 0.7854  | (CLA) Last third trimester urine culture - result                                                                  |
| CLAD02a1b | CLA  |      | 3        | Onehot | 0.9561  | (CLA) Last third trimester urine culture - Organism code (1)                                                       |
| CLAD02a2b | CLA  |      | 3        | Onehot | 0.9962  | (CLA) Last third trimester urine culture - Organism code (2)                                                       |
| CLAD03a   | CLA  |      | 3        | Onehot | 0.7255  | (CLA) Last third trimester Gonorrheal screen - Result                                                              |
| CLAD04a   | CLA  |      | 3        | Onehot | 0.7268  | (CLA) Last third trimester Chlamydial screen - result                                                              |
| CLAD05a   | CLA  |      | 3        | Onehot | 0.6993  | (CLA) Last third trimester VDRL/RPR (syphilis) test - Result                                                       |
| CLAD06a   | CLA  |      | 3        | Onehot | 0.1277  | (CLA) Last third trimester GBS culture/test - Result                                                               |

| NAME        | FILE               | RULE | TEMPORAL | IMPUTE | MISSING | DESCRIPTION                                                                                                                                 |
|-------------|--------------------|------|----------|--------|---------|---------------------------------------------------------------------------------------------------------------------------------------------|
| CMAC16      | CMA                |      | 4        | Onehot | 0.0021  | (CMA) Did the participant have a diagnosis of chorioamnionitis documented in the chart by a care giver prior to delivery                    |
| CMAE05      | CMA                |      | 4        | Onehot | 0.0018  | (CMA) Abruptio placenta                                                                                                                     |
| CMAE09      | CMA                |      | 4        | Onehot | 0.0019  | (CMA) Cerebral vascular accident (CVA)                                                                                                      |
| CMAE10      | CMA                |      | 4        | Onehot | 0.0018  | (CMA) SEver anemia (Hematocrit < 20 vol% treated with blood transfusion)                                                                    |
| CMAH01b3    | CMA                |      | 4        | Mean   | 0.2241  | (CMA) Results of complete blood count: - Hemoglobin (g/dL)                                                                                  |
| CMAH01b4    | CMA                |      | 4        | Mean   | 0.2244  | (CMA) Results of complete blood count: - Hematocrit (%)                                                                                     |
| CMAH01b6    | CMA                |      | 4        | Mean   | 0.2276  | (CMA) Results of complete blood count: - Platelet count $\times 10^3 / \text{mm}^3$ ( $\times 10^3 / \text{L}$ )                            |
| CMAH02b     | CMA                |      | 4        | Onehot | 0.9791  | (CMA) Gonorrhea screen test result                                                                                                          |
| CMAH03b     | CMA                |      | 4        | Onehot | 0.9786  | (CMA) Chlamydia screen test result                                                                                                          |
| CMAH04b     | CMA                |      | 4        | Onehot | 0.9583  | (CMA) Urine drug screen result                                                                                                              |
| CMBF01b     | CMB                |      | 4        | Onehot | 0.8973  | (CMB) Participant had a cervico-vaginal fetal fibronectin sampled collected, result                                                         |
| CMBG01      | CMB                |      | 4        | Onehot | 0       | (CMB) Participant had a cerclage placed                                                                                                     |
| CMBI01      | CMB                |      | 4        | Onehot | 0       | (CMB) Did the participant receive tocolysis at any time during this hospital encounter?                                                     |
| CMBJ01      | CMB                |      | 4        | Onehot | 0       | (CMB) Did the participant have an infection or receive antibiotics during this hospital encounter?                                          |
| CMBJ02      | CMB                |      | 4        | Onehot | 0.8441  | (CMB) Urinary tract infection or pyelonephritis                                                                                             |
| CMBJ03      | CMB                |      | 4        | Onehot | 0.8441  | (CMB) Sepsis                                                                                                                                |
| CMBJ04      | CMB                |      | 4        | Onehot | 0.8422  | (CMB) Pneumonia                                                                                                                             |
| CMBJ05      | CMB                |      | 4        | Onehot | 0.8384  | (CMB) Other maternal infections (e.g., viral, fungal, parasitic, spirochetal, other bacterial), excluding bacterial vaginosis               |
| CMEA01      | CME                |      | 4        | Onehot | 0       | (CME) Urinary tract infection                                                                                                               |
| CMEA02      | CME                |      | 4        | Onehot | 0       | (CME) Sepsis                                                                                                                                |
| CMEA03      | CME                |      | 4        | Onehot | 0       | (CME) Pneumonia                                                                                                                             |
| CMEA04      | CME                |      | 4        | Onehot | 0       | (CME) Other maternal infections (e.g., viral, fungal, parasitic, spirochetal, other bacterial), excluding bacterial vaginosis               |
| GravCat     | Demographics       |      | 1        | Mode   | 0.001   | Gravidity category (V1AE01)                                                                                                                 |
| oDM         | Pregnancy outcomes |      | 0        | Mode   | 0.047   | Diabetes based on CMAE03 & glucose tolerance testing results in CLA section E                                                               |
| ChronHTN    | Pregnancy outcomes |      | 1        | Mode   | 0.0567  | Chronic hypertension based on CMDA01 & CMAE01                                                                                               |
| PEgHTN      | Pregnancy outcomes |      | 3        | Mode   | 0.0568  | Preeclampsia/Gestational HTN (worst) using nuMoM2b criteria (CMDA08a)                                                                       |
| S02A01      | S02                |      | 0        | Mean   | 0       | (S02) Total number of pregnancies including current pregnancy - number of pregnancies                                                       |
| S02C01      | S02                |      | 0        | Onehot | 0.0003  | (S02) Assisted reproduction for this pregnancy                                                                                              |
| V1AD01b     | V1A                |      | 1        | Mean   | 0.0207  | (V1A) How much did you weigh before you got pregnant? - lbs                                                                                 |
| V1AD12a     | V1A                |      | 1        | Onehot | 0.0003  | (V1A) Previous surgeries - Cervical surgery - cone                                                                                          |
| V1AD12b     | V1A                |      | 1        | Onehot | 0.0003  | (V1A) Previous surgeries - Cervical surgery - LEEP                                                                                          |
| V1AD12c     | V1A                |      | 1        | Onehot | 0.0003  | (V1A) Previous surgeries - Cervical surgery - Cryotherapy                                                                                   |
| VXXB01aa_FA | VXX                |      | 4        | Onehot | 0       | (VXX) Medical conditions or diagnoses, High blood pressure (hypertension) - Final Assessment: Condition present                             |
| VXXB01ab_FA | VXX                |      | 4        | Onehot | 0       | (VXX) Medical conditions or diagnoses, Asthma - Final Assessment: Condition present                                                         |
| VXXB01ac_FA | VXX                |      | 4        | Onehot | 0       | (VXX) Medical conditions or diagnoses, Seizure disorder - Final Assessment: Condition present                                               |
| VXXB01ad_FA | VXX                |      | 4        | Onehot | 0       | (VXX) Medical conditions or diagnoses, Migraine headaches - Final Assessment: Condition present                                             |
| VXXB01ae_FA | VXX                |      | 4        | Onehot | 0       | (VXX) Medical conditions or diagnoses, Diabetes (excluding gestational diabetes in a prior pregnancy) - Final Assessment: Condition present |



| NAME         | FILE | RULE | TEMP | IMPUTE | MISSING | DESCRIPTION                                                                                                                                            |
|--------------|------|------|------|--------|---------|--------------------------------------------------------------------------------------------------------------------------------------------------------|
| VXXB01ae1_FA | VXX  |      | 4    | Onehot | 0       | (VXX) Medical conditions or diagnoses, Diabetes, onset during pregnancy (gestational diabetes) - Final Assessment: Condition present                   |
| VXXB01af_FA  | VXX  |      | 4    | Onehot | 0       | (VXX) Medical conditions or diagnoses, Hyperthyroidism - Final Assessment: Condition present                                                           |
| VXXB01ag_FA  | VXX  |      | 4    | Onehot | 0       | (VXX) Medical conditions or diagnoses, Hypothyroidism - Final Assessment: Condition present                                                            |
| VXXB01ah_FA  | VXX  |      | 4    | Onehot | 0       | (VXX) Medical conditions or diagnoses, Valvular heart disease - Final Assessment: Condition present                                                    |
| VXXB01ai_FA  | VXX  |      | 4    | Onehot | 0       | (VXX) Medical conditions or diagnoses, Other structural heart disease - Final Assessment: Condition present                                            |
| VXXB01aj_FA  | VXX  |      | 4    | Onehot | 0       | (VXX) Medical conditions or diagnoses, Coronary artery disease / congestive heart failure (angina, heart attack) - Final Assessment: Condition present |
| VXXB01ak_FA  | VXX  |      | 4    | Onehot | 0       | (VXX) Medical conditions or diagnoses, Cardiac arrhythmias - Final Assessment: Condition present                                                       |
| VXXB01al_FA  | VXX  |      | 4    | Onehot | 0.0004  | (VXX) Medical conditions or diagnoses, Kidney disease - Final Assessment: Condition present                                                            |
| VXXB01am_FA  | VXX  |      | 4    | Onehot | 0.0004  | (VXX) Medical conditions or diagnoses, Urinary tract infection (provider diagnosed) - Final Assessment: Condition present                              |
| VXXB01an_FA  | VXX  |      | 4    | Onehot | 0.0004  | (VXX) Medical conditions or diagnoses, Sickle cell disease - Final Assessment: Condition present                                                       |
| VXXB01ao_FA  | VXX  |      | 4    | Onehot | 0.0004  | (VXX) Medical conditions or diagnoses, Sickle cell trait - Final Assessment: Condition present                                                         |
| VXXB01ap_FA  | VXX  |      | 4    | Onehot | 0.0004  | (VXX) Medical conditions or diagnoses, Thrombocytopenia - Final Assessment: Condition present                                                          |
| VXXB01aq_FA  | VXX  |      | 4    | Onehot | 0.0004  | (VXX) Medical conditions or diagnoses, Anemia - Final Assessment: Condition present                                                                    |
| VXXB01ar_FA  | VXX  |      | 4    | Onehot | 0.0004  | (VXX) Medical conditions or diagnoses, History of blood clots (thrombosis or thromboembolism) or stroke - Final Assessment: Condition present          |
| VXXB01as_FA  | VXX  |      | 4    | Onehot | 0.0004  | (VXX) Medical conditions or diagnoses, Congenital or inherited bleeding disorder - Final Assessment: Condition present                                 |
| VXXB01at_FA  | VXX  |      | 4    | Onehot | 0.0004  | (VXX) Medical conditions or diagnoses, Antiphospholipid syndrome (APA) or other acquired thrombophilia - Final Assessment: Condition present           |
| VXXB01au_FA  | VXX  |      | 4    | Onehot | 0.0005  | (VXX) Medical conditions or diagnoses, Systemic lupus erythematosus (SLE) - Final Assessment: Condition present                                        |
| VXXB01av_FA  | VXX  |      | 4    | Onehot | 0.0005  | (VXX) Medical conditions or diagnoses, Rheumatoid arthritis - Final Assessment: Condition present                                                      |
| VXXB01aw_FA  | VXX  |      | 4    | Onehot | 0.0005  | (VXX) Medical conditions or diagnoses, Other collagen vascular or autoimmune disease - Final Assessment: Condition present                             |
| VXXB01ax_FA  | VXX  |      | 4    | Onehot | 0.0005  | (VXX) Medical conditions or diagnoses, Ulcerative colitis / Crohn's disease - Final Assessment: Condition present                                      |

| NAME                 | FILE | RULE     | TEMP | IMPUTE | MISSING | DESCRIPTION                                                                                                                            |
|----------------------|------|----------|------|--------|---------|----------------------------------------------------------------------------------------------------------------------------------------|
| VXXB01ay_FA          | VXX  |          | 4    | Onehot | 0.0005  | (VXX) Medical conditions or diagnoses, Cholestasis of pregnancy - Final Assessment: Condition present                                  |
| VXXB01az_FA          | VXX  |          | 4    | Onehot | 0.0005  | (VXX) Medical conditions or diagnoses, Liver/gall bladder disease - Final Assessment: Condition present                                |
| VXXB01ba_FA          | VXX  |          | 4    | Onehot | 0.0005  | (VXX) Medical conditions or diagnoses, Cancer (malignancy) - Final Assessment: Condition present                                       |
| VXXB01bb_FA          | VXX  |          | 4    | Onehot | 0.0005  | (VXX) Medical conditions or diagnoses, Mental health condition - Final Assessment: Condition present                                   |
| VXXB01bc1_FA         | VXX  |          | 4    | Onehot | 0.0005  | (VXX) Medical conditions or diagnoses, Gynecological Conditions, Cervical dysplasia - Final Assessment: Condition Present              |
| VXXB01bc2_FA         | VXX  |          | 4    | Onehot | 0.0005  | (VXX) Medical conditions or diagnoses, Gynecological Conditions, Fibroids - Final Assessment: Condition present                        |
| VXXB01bc3_FA         | VXX  |          | 4    | Onehot | 0.0005  | (VXX) Medical conditions or diagnoses, Gynecological Conditions, Polycystic ovary disease (PCOS) - Final Assessment: Condition present |
| VXXB01bd1_FA         | VXX  |          | 4    | Onehot | 0.0005  | (VXX) Medical conditions or diagnoses, Sexually transmitted diseases, Gonorrhea - Final Assessment: Condition present                  |
| VXXB01bd2_FA         | VXX  |          | 4    | Onehot | 0.0005  | (VXX) Medical conditions or diagnoses, Sexually transmitted diseases, Chlamydia - Final Assessment: Condition present                  |
| VXXB01bd3_FA         | VXX  |          | 4    | Onehot | 0.0005  | (VXX) Medical conditions or diagnoses, Sexually transmitted diseases, Herpes - Final Assessment: Condition present                     |
| VXXB01bd4_FA         | VXX  |          | 4    | Onehot | 0.0005  | (VXX) Medical conditions or diagnoses, Sexually transmitted diseases, Syphilis - Final Assessment: Condition present                   |
| VXXB01bd5_FA         | VXX  |          | 4    | Onehot | 0.0005  | (VXX) Medical conditions or diagnoses, Sexually transmitted diseases, HIV/AIDS - Final Assessment: Condition                           |
| VXXB01bd6_FA         | VXX  |          | 4    | Onehot | 0.0005  | (VXX) Medical conditions or diagnoses, Sexually transmitted diseases, Hepatitis B - Final Assessment: Condition                        |
| VXXB01bd7_FA         | VXX  |          | 4    | Onehot | 0.0005  | (VXX) Medical conditions or diagnoses, Sexually transmitted diseases, Hepatitis C - Final Assessment: Condition                        |
| VXXB01bd8_FA         | VXX  |          | 4    | Onehot | 0.0005  | (VXX) Medical conditions or diagnoses, Sexually transmitted diseases, Trichomonas - Final Assessment: Condition                        |
| VXXB01bd9_FA         | VXX  |          | 4    | Onehot | 0.0005  | (VXX) Medical conditions or diagnoses, Sexually transmitted diseases, Other - Final Assessment: Condition present                      |
| VXXB01be_FA          | VXX  |          | 4    | Onehot | 0.0005  | (VXX) Medical conditions or diagnoses, Yeast infection (provider diagnosed) - Final Assessment: Condition present                      |
| VXXB01bf_FA          | VXX  |          | 4    | Onehot | 0.0005  | (VXX) Medical conditions or diagnoses, Bacterial vaginosis - Final Assessment: Condition present                                       |
| <b>GEST_AGE_LOSS</b> | S02  | GEST_AGE | 0    | 0      |         |                                                                                                                                        |
| S02A01a.1            | S02  |          | 0    |        | 0.8565  | (S02) Pregnancy #1 - Gestational age at time of loss, weeks                                                                            |
| S02A01b.1            | S02  |          | 0    |        | 0.8892  | (S02) Pregnancy #1 - Gestation age at time of loss                                                                                     |
| S02A02.1             | S02  |          | 0    |        | 0.7489  | (S02) Pregnancy #1 - Spontaneous delivery or miscarriage                                                                               |
| S02A01a.2            | S02  |          | 0    |        | 0.9641  | (S02) Pregnancy #2 - Gestational age at time of loss, weeks                                                                            |

### Medical History Filtering

## 6.9 Outcomes

The outcomes filtering concerns post-pregnancy analysis of the newborn (all kinds of delivery), and variables that are highly predictive of preterm birth, such as major fetal conditions. Some of these variables may be used as class labels, such as pOUTCOME or GAwksEND, and others may provide privileged information for certain models. **The vast majority of this data is highly prone to class leakage and should not be used in modeling, but is used for data analysis.** Provided in the table are a **sample** of features that are useful in data analysis or as class labels.

**Total # Features:** 1165

**Relevant Files:** CBA, CBB, CBC, CMA, CMC, CPA, pregnancy\_outcomes, S02, U02, U2A, U3A, V4A

| NAME          | FILE               | RULE | TEMPORAL | IMPUTE | MISSING | DESCRIPTION                                                                                            |
|---------------|--------------------|------|----------|--------|---------|--------------------------------------------------------------------------------------------------------|
| CBAA04a       | CBA                |      | 5        |        | 0.0051  | (CBA) Apgar scores - One minute                                                                        |
| CBAA04a_Check | CBA                |      | 5        |        | 0       | (CBA) Apgar scores - One minute, not available                                                         |
| CBAA04b       | CBA                |      | 5        |        | 0.0054  | (CBA) Apgar scores - Five minute                                                                       |
| CBAA04b_Check | CBA                |      | 5        |        | 0       | (CBA) Apgar scores - Five minute, not available                                                        |
| CBAA04c       | CBA                |      | 5        |        | 0.9609  | (CBA) Apgar scores - Ten minute                                                                        |
| CBAA04c_Check | CBA                |      | 5        |        | 0       | (CBA) Apgar scores - Ten minute, not available                                                         |
| bw            | pregnancy_outcomes |      | 5        |        | 0.0602  | Birth weight in grams based on CBAA05 (for livebirths) or CBCA04 (for stillbirths)                     |
| CBAA02        | CBA                |      | 5        |        | 0.0013  | (CBA) Gender of baby or fetus                                                                          |
|               |                    |      | 4        |        |         |                                                                                                        |
| pOUTCOME      | pregnancy_outcomes |      | 4        |        | 0.0352  | Pregnancy outcome based on chart abstraction & A09                                                     |
| PROM          | pregnancy_outcomes |      | 4        |        | 0.0592  | Premature rupture of membranes based on CMAC06c & CMAC06d                                              |
| SPONTANEOUS   | pregnancy_outcomes |      | 4        |        | 0.0546  | Spontaneous or indicated based on PROM and CMAC06                                                      |
| GAwksEND      | pregnancy_outcomes |      | 4        |        | 0.0374  | Gestational age (weeks) at pregnancy end based on S02F01 and both chart abstraction & A09              |
| TYPE_CA_A09   | pregnancy_outcomes |      | 4        |        | 0       | Type of livebirth/stillbirth based on chart abstraction & A09, derived from multiple outcome variables |

## 6.10 Treatment

The treatment filtering contains features that pertain to drug administration directly related to delivery or the prevention of preterm birth. This includes administration of steroids for fetal lung maturation, tocolytics, progesterone, and various classes of drugs used specifically for delivery. **These features are highly predictive of PTB, and are thus only used for analysis or sequential treatment decision making. Shown is a sample of these features.**

**Total # Features:** 149

**Layer 1 # Features:** N/A (27 Available)

**Layer 2 # Features:** N/A (34 Available)

**Relevant Files:** CMA

**Dropped Features:** For this group, there was much metadata that was used to place the administration within a particular time point, and then later dropped. Medication codes were used instead of names. Details on which particular drug within a class was used were dropped in L1, as the intended and possible effect were known and similar. Anticonvulsant details were returned in L2 as they can have dramatic differences.

| NAME       | FILE | RULE | TEMPORAL         | IMPUTE | MISSINGNESS | DESCRIPTION                                                                                                           |
|------------|------|------|------------------|--------|-------------|-----------------------------------------------------------------------------------------------------------------------|
| CMAF01     | CMA  |      | Date Abstraction | ANY    | 0.002       | (CMA) Did the Participant receive steroids for fetal lung maturation at any time during this pregnancy?               |
| CMAF02     | CMA  |      | Date Abstraction | ANY    | 0.0023      | (CMA) Did the Participant receive progesterone at any time during this pregnancy?                                     |
| CMAF01a    | CMA  |      | Date Abstraction | ANY    | 0.0011      | (CMA) Steroids for fetal lung maturation: Betamethasone                                                               |
| CMAF01a3   | CMA  |      | Date Abstraction | ANY    | 0.9544      | (CMA) Steroids for fetal lung maturation: Betamethasone - Total number of injections given over pregnancy             |
| CMAF01b    | CMA  |      | Date Abstraction | ANY    | 0.0011      | (CMA) Steroids for fetal lung maturation: Dexamethasone - Dexamethasone                                               |
| CMAF01b3   | CMA  |      | Date Abstraction | ANY    | 0.9992      | (CMA) Steroids for fetal lung maturation: Dexamethasone - Total number of doses given over pregnancy                  |
| CMAF02a    | CMA  |      | Date Abstraction | 999    | 0.981       | (CMA) Progesterone vehicle of administration:                                                                         |
| CMAF02a.sp | CMA  |      | Date Abstraction | 999    | 0.9979      | (CMA) Progesterone vehicle of administration: - Other, specify                                                        |
| CMAF02b1   | CMA  |      | Date Abstraction | -1     | 0.9979      | (CMA) Progesterone dose - %                                                                                           |
| CMAF02b2   | CMA  |      | Date Abstraction | -1     | 0.989       | (CMA) Progesterone dose - mg                                                                                          |
| CMAF02c    | CMA  |      | Date Abstraction | 0      | 0.9743      | (CMA) Progesterone frequency of administration                                                                        |
| CMAF02c.sp | CMA  |      | Date Abstraction | 999    | 0.9875      | (CMA) Progesterone frequency of administration - Other, specify                                                       |
| CMAG01     | CMA  |      | 4                | ANY    | 0.0021      | (CMA) Did the Participant receive tocolysis at any time during this hospitalization for delivery?                     |
| CMAG02     | CMA  |      | 4                | ANY    | 0.0021      | (CMA) Were antibiotics used anytime during this hospitalization for delivery?                                         |
| CMAG03     | CMA  |      | 4                | ANY    | 0.002       | (CMA) Were antihypertensives used anytime during this hospitalization for delivery?                                   |
| CMAG04     | CMA  |      | 4                | ANY    | 0.002       | (CMA) Were anticonvulsants used anytime during this hospitalization for delivery?                                     |
| CMAG05     | CMA  |      | 4                | ANY    | 0.0018      | (CMA) Was magnesium sulfate given specifically for neuroprophylaxis anytime during this hospitalization for delivery? |
| CMAG06     | CMA  |      | 4                | ANY    | 0.0021      | (CMA) Were any other prescribed medications used during this hospitalization for delivery?                            |
| CMAG06a    | CMA  |      | 4                | 2      | 0.0011      | (CMA) Other prescribed medications used during this hospitalization for delivery - Insulin                            |
| CMAG06b    | CMA  |      | 4                | 2      | 0.0011      | (CMA) Other prescribed medications used during this hospitalization for delivery - Heparin / LMW heparin injection    |
| CMAG06c1   | CMA  |      | 4                | 777    | 0.7016      | (CMA) Other prescribed medications used during this hospitalization for delivery - Medication code (1)                |
| CMAG06d1   | CMA  |      | 4                | 777    | 0.871       | (CMA) Other prescribed medications used during this hospitalization for delivery - Medication code (2)                |
| CMAG06e1   | CMA  |      | 4                | 777    | 0.9373      | (CMA) Other prescribed medications used during this hospitalization for delivery - Medication code (3)                |
| CMAG06f1   | CMA  |      | 4                | 777    | 0.9667      | (CMA) Other prescribed medications used during this hospitalization for delivery - Medication code (4)                |
| CMAG06g1   | CMA  |      | 4                | 777    | 0.9821      | (CMA) Other prescribed medications used during this hospitalization for delivery - Medication code (5)                |
| CMAG06h1   | CMA  |      | 4                | 777    | 0.9888      | (CMA) Other prescribed medications used during this hospitalization for delivery - Medication code (6)                |
| CMAG06i1   | CMA  |      | 4                | 777    | 0.9935      | (CMA) Other prescribed medications used during this hospitalization for delivery - Medication code (7)                |

## 6.11 Food Frequency Analysis

The food frequency analysis file takes into account the food and nutrients consumed by patients in the 3 months prior to conception. We were most interested in the calculated nutrient intake as opposed to less interpretable data like grams of food consumed or food pyramid group quantities. In addition to nutrients, we also attempted to capture the overall energy intake by using glycemic load and calorie intake as proxies.

**Total Features:** 737

**Layer 1 Features:** 38

**Layer 2 Features:** 38

**Relevant Files:** food\_frequency\_analysis (ancillary)

**Dropped Features:** For this group, we dropped the features that contained redundant information about food intake that was already captured by the vitamin amounts. For instance, quantities of food items such as “glasses of milk” would be reflected in the overall vitamin and calorie consumption.

Table 10: Food Frequency Filtering

| NAME     | FILE                    | RULE | TEMPORAL | IMPUTE | MISSING | DESCRIPTION                                       |
|----------|-------------------------|------|----------|--------|---------|---------------------------------------------------|
| GL       | food frequency analysis |      | 0        | mean   | 0       | Glycemic Load                                     |
| DT_KCAL  | food frequency analysis |      | 0        | mean   | 0       | KCAL Total                                        |
| DT_THEOB | food frequency analysis |      | 0        | mean   | 0       | Theobromine, mg, average daily                    |
| FOLDFE   | food frequency analysis |      | 0        | mean   | 0       | Average daily Dietary Folate Equivalents, mcg     |
| DT_METHI | food frequency analysis |      | 0        | mean   | 0       | Methionine (S-containing), grams                  |
| DT_CALC  | food frequency analysis |      | 0        | mean   | 0       | Calcium, mg                                       |
| DT_IRON  | food frequency analysis |      | 0        | mean   | 0       | Iron, mg                                          |
| DT_MAGN  | food frequency analysis |      | 0        | mean   | 0       | Magnesium, mg                                     |
| DT_PHOS  | food frequency analysis |      | 0        | mean   | 0       | Phosphorus, mg                                    |
| DT_POTA  | food frequency analysis |      | 0        | mean   | 0       | Potassium, mg                                     |
| DT_SODI  | food frequency analysis |      | 0        | mean   | 0       | Sodium, mg                                        |
| DT_ZINC  | food frequency analysis |      | 0        | mean   | 0       | Zinc, mg                                          |
| DT_COPP  | food frequency analysis |      | 0        | mean   | 0       | Copper, mg                                        |
| DT_SEL   | food frequency analysis |      | 0        | mean   | 0       | Selenium, mcg                                     |
| DT_VARAE | food frequency analysis |      | 0        | mean   | 0       | Vitamin A Retinol Activity Equivalents (RAE), mcg |
| DT_RET   | food frequency analysis |      | 0        | mean   | 0       | Retinol, mcg                                      |
| DT_ACARO | food frequency analysis |      | 0        | mean   | 0       | Alpha-carotene, mcg                               |
| DT_BCARO | food frequency analysis |      | 0        | mean   | 0       | Beta-carotene, mcg                                |
| DT_CRYPT | food frequency analysis |      | 0        | mean   | 0       | Cryptoxanthin, mcg                                |
| DT_LYCO  | food frequency analysis |      | 0        | mean   | 0       | Lycopene, mcg                                     |
| DT_LUTZE | food frequency analysis |      | 0        | mean   | 0       | Lutein-Zeaxanthin, mcg                            |
| DT_ATOC  | food frequency analysis |      | 0        | mean   | 0       | Vitamin E as alpha-tocopherol, mg                 |
| DT_VITC  | food frequency analysis |      | 0        | mean   | 0       | Vitamin C, mg                                     |
| DT_THIA  | food frequency analysis |      | 0        | mean   | 0       | Thiamin (Vitamin B1), mg                          |
| DT_RIBO  | food frequency analysis |      | 0        | mean   | 0       | Riboflavin (Vitamin B2), mg                       |
| DT_NIAC  | food frequency analysis |      | 0        | mean   | 0       | Niacin, mg                                        |
| DT_VITB6 | food frequency analysis |      | 0        | mean   | 0       | Vitamin B6, mg                                    |
| DT_VB12  | food frequency analysis |      | 0        | mean   | 0       | Vitamin B-12, mcg                                 |
| DT_VITK  | food frequency analysis |      | 0        | mean   | 0       | Vitamin K as phylloquinone, mcg                   |
| DT_FA182 | food frequency analysis |      | 0        | mean   | 0       | Dietary PUFA (~N-6) 18:2, grams                   |
| DT_FA183 | food frequency analysis |      | 0        | mean   | 0       | Dietary PUFA (~N-3) 18:3, grams                   |
| DT_FA184 | food frequency analysis |      | 0        | mean   | 0       | Dietary PUFA 18:4, grams                          |
| DT_FA204 | food frequency analysis |      | 0        | mean   | 0       | Dietary PUFA (~N-6) 20:4, grams                   |
| DT_FA205 | food frequency analysis |      | 0        | mean   | 0       | Dietary N-3 PUFA 20:5 (EPA), grams                |
| DT_FA225 | food frequency analysis |      | 0        | mean   | 0       | Dietary N-3 PUFA 22:5 (DPA), grams                |
| DT_FA226 | food frequency analysis |      | 0        | mean   | 0       | Dietary N-3 PUFA 22:6 (DHA), grams                |
| DT_TOTN6 | food frequency analysis |      | 0        | mean   | 0       | Avg. daily omega-6 FA, grams                      |
| DT_TOTN3 | food frequency analysis |      | 0        | mean   | 0       | Avg. daily omega-3 FA, grams                      |

## 6.12 Sleep Substudy

The sleep substudy filtering includes sleep quantity and quality by calculating the average hours slept per night as well as sleep apnea diagnoses.

**Total Features:** 6

**Layer 1 Features:** 4

**Layer 2 Features:** 6

**Relevant Files:** V1L, V3L

**Dropped Features:** Due to sleep being a separate substudy, only a few features were selected to be included. The rest were dropped as of writing.

Table 11: Sleep Substudy Filtering

| NAME             | FILE | RULE      | TEMPORAL | IMPUTE | MISSING | DESCRIPTION                                                                                                             |
|------------------|------|-----------|----------|--------|---------|-------------------------------------------------------------------------------------------------------------------------|
| V1LF01a          | V1L  |           | 1        | Onehot | 0.00514 | Have you ever been told by a doctor or other health professionals that you have sleep apnea or obstructive sleep apnea? |
| V3LF01a          | V3L  |           | 3        | Onehot | 0.00464 | Have you ever been told by a doctor or other health professionals that you have sleep apnea or obstructive sleep apnea? |
| <b>V1A_SLEEP</b> | V1L  | SLEEP_AVG | 1        | Mean   |         |                                                                                                                         |
| V1LA02a          | V1L  |           | 1        |        | 0.00463 | How many hours of sleep do you usually get per night: On weekdays or workdays?                                          |
| V1LA02b          | V1L  |           | 1        |        | 0.00463 | How many hours of sleep do you usually get per night: On weekends?                                                      |
| <b>V3A_SLEEP</b> | V3L  | SLEEP_AVG | 3        | Mean   |         |                                                                                                                         |
| V3LA02a          | V3L  |           | 3        |        | 0.00357 | How many hours of sleep do you usually get per night: On weekdays or workdays?                                          |
| V3LA02b          | V3L  |           | 3        |        | 0.00357 | How many hours of sleep do you usually get per night: On weekends?                                                      |

## 6.13 Genetic data

The genotyped cohort comprises 9,757 nulliparous women from the nuMoM2b study who had adequate samples and agreed to be genotyped. DNA extractions from whole blood, which had been frozen at  $-80^{\circ}$ , were carried out on a Qiasymphony instrument at the Center for Bioinformatics and Genomics (Indiana University). Genotyping was done at the Van Andel Institute (Grand Rapids, MI, USA) using the Infinium Multi-Ethnic Global D2 BeadChip (Illumina, Miami, USA). We imposed standard filters for quality control of loci at this stage (cluster separation  $< 0.3$ , AA R Mean  $< 0.2$ , AB R Mean  $< 0.2$ , BB R Mean  $< 0.2$ , 10% GC  $< 0.3$ ) using GenomeStudio v2.4 (Illumina). Genotype calls (in .GCT format) for the 1,748,280 loci that passed initial quality control were made with Beeline autoconvert (Illumina).

## 7 Lessons Learned and Discussion

The main goals of the data preprocessing of the nuMoM2b dataset were to get a deeper understanding of the data, extract the most relevant features, and reduce the dimensionality of the data. Additionally, we wanted to make the fewest assumptions when filling in unknown values, and to understand the intricacies behind the dependencies present in the data.

The original ratio of features to patients of around 4,600 to 10,000 is too high to create reliable models because of the high possibility of over-fitting in a high dimensional space. Therefore, it was crucial for the interdisciplinary team to work together to leverage medical expertise, computing and statistics skills in order to gain a good grasp

of the wealth of information in the nuMoM2b dataset. The data preprocessing team worked to make sure that any medical assumptions, such as grouping related conditions together or deciding to drop select details, were approved by the medical experts.

It was equally crucial to understand the protocol that doctors follow in the administration of interventions. Debates about definitions, classification of conditions, and treatments exist and were taken into consideration. A notable example is the debate around the usage of progesterone as an intervention for preterm birth. Another is simply the definitions of spontaneous and indicated preterm birth and how the events that fall under those categories may have changed over time.

With regards to the data itself, the most significant challenges were understanding the dependencies between different features and their medical relevance to preterm birth. The data includes both patient interviews and abstractions from the patients' charts. Sometimes the questions overlapped, other times they were parallel, or had features that combined information from both. Each source has a different level of relevance in building the models.

Standardization of data formatting was another obstacle. Much of the original labeling and information provided in the codebooks was not sufficient to directly begin the modeling process. For instance, labels such as variable type had to be manually added. It was also important to determine when specific data were relevant and when they were collected. For example, for data that were not collected exactly within the strict time designations for Visits 1 through 4, the associated dates were computed relative to the estimated date for the start of pregnancy. Manual inspection was also required when coded values of responses did not match the information shown in the data collection forms. Codings such as *Don't Know*, or *Refused response* did not exist in the data even though they were mentioned in the codebooks.

Throughout the preprocessing, we aimed to make the filtering and imputation steps as systematic as possible, while organizing the data into medically homogeneous groups. The discussion here is merely a glimpse of the intended goals and actions taken during the preprocessing. As our team delves into the PTB-related research goals, we anticipate that more preprocessing will be required on specific data.

## 8 Institutional review board statement and funding sources

Human subjects approval for this study, titled "SCH: Prediction of Preterm Birth in Nulliparous Women", was obtained following review by Columbia University Human Subjects Institutional Review Board under number IRB-AAAR9413, and the City University of New York CUNY HRPP/IRB review number 2019-0855. Human subjects training requirements were completed by all authors of this study.

This work is supported by NIH/NLM ([www.nlm.nih.gov](http://www.nlm.nih.gov)) grant R01LM013327.

## References

- [1] <http://www.nichd.nih.gov/research/supported/Pages/nuMoM2b.aspx>.
- [2] Clinical Informatics Group. Data pre-processing for the preterm prediction study MFMU dataset. <http://www.cs.columbia.edu/~ansaf/cing/CCLS-13-04.pdf>, 2013.
- [3] David Haas et al. A description of the methods of the nulliparous pregnancy outcomes study: monitoring mothers-to-be (numom2b). *American Journal of Obstetrics and Gynecology*, 212(4):539.e1–539.e24, 2015.
- [4] Ilia Vovsha, Ashwath Rajan, Ansaf Salleb-Aouissi, Anita Raja, Axinia Radeva, Hatim Diab, Ashish Tomar, and Ronald Wapner. Predicting preterm birth is not elusive: Machine learning paves the way to individual wellness, 2014.
- [5] Ilia Vovsha, Ansaf Salleb-Aouissi, Anita Raja, Thomas Koch, Alex Rybchuk, Axinia Radeva, Ashwath Rajan, Yiwen Huang, Hatim Diab, Ashish Tomar, and Ronald Wapner. Using kernel methods and model selection for prediction of preterm birth. In Finale Doshi-Velez, Jim Fackler, David Kale, Byron Wallace, and Jenna Wiens, editors, *Proceedings of the 1st Machine Learning for Healthcare Conference*, volume 56 of *Proceedings of Machine Learning Research*, pages 55–72, Children's Hospital LA, Los Angeles, CA, USA, 18–19 Aug 2016. PMLR.
